# Supplementary material for: Artificial aldolases from peptide dendrimer combinatorial libraries
Source: Royal Society of Chemistry journal article supplement (doi:10.1039/b607342e), 2006-01-01

## **Electronic Supplementary Information:**

### **Aldolase Peptide Dendrimers from Combinatorial Libraries**

Jacob Kofoed, Tamis Darbre and Jean-Louis Reymond\*

*Department of Chemistry and Biochemistry, University of Berne, Freiestrasse 3, CH-3012 Berne, Switzerland*

jean-louis.reymond@ioc.unibe.ch

**HPLC-integration for sequence determination of single peptide dendrimers on resin beads.**

HPLC-integration data for amino acid analysis of single beads of dendrimers after total hydrolysis with 6M HCl solution at 110°C for 22 h and derivitization with phenyl isothiocyanate (PITC). The sequence of dendrimers is deduced from the HPLC-peak integration of each amino acid PITC-derivative relative to the reference integration of this derivative. The Dap (2,3-diaminopropanoic acid) branching unit co-elutes with phenylalanine (relative integration =91.0). The value is subtracted before calculating integration for this amino acid.

**HPLC-trace for analysis of the bead of catalytic dendrimer L2D1 identified as catalytic.**

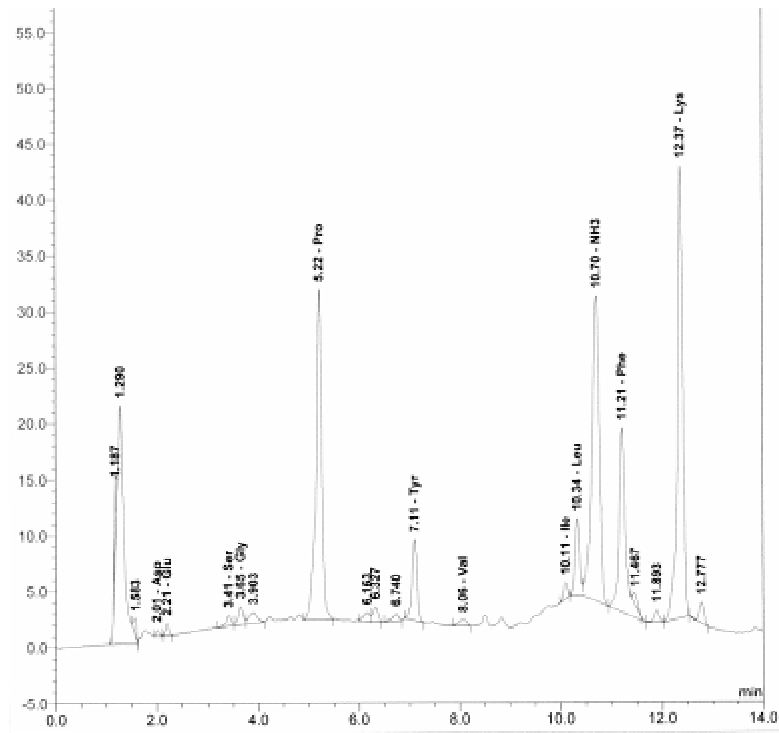

| RT<br>min     | RT (STD)<br>min | PW(50%)<br>min | Area<br>mAU*min | Height<br>mAU | Amount<br>pmol | Peak Name |
|---------------|-----------------|----------------|-----------------|---------------|----------------|-----------|
| 2.01          | 2.00            | 0.087          | 0.04            | 0.55          | 3.0            | Asp       |
| 2.21          | 2.20            | 0.072          | 0.06            | 1.07          | 6.3            | Glu       |
| 3.41          | 3.40            | 0.098          | 0.12            | 0.96          | 6.7            | Ser       |
| 3.65          | 3.64            | 0.087          | 0.19            | 1.64          | 10.9           | Gly       |
| 5.22          | 5.22            | 0.102          | 3.89            | 29.49         | 181.3          | Pro       |
| 7.11          | 7.09            | 0.102          | 0.83            | 7.25          | 51.1           | Tyr       |
| 8.06          | 8.10            | 0.187          | 0.10            | 0.52          | 3.8            | Val       |
| 10.11         | 10.10           | 0.089          | 0.13            | 1.47          | 10.1           | Ile       |
| 10.34         | 10.33           | 0.099          | 0.73            | 6.92          | 50.7           | Leu       |
| 10.70         | 10.69           | 0.152          | 4.61            | 27.26         | 540.7          | NH3       |
| 11.21         | 11.23           | 0.115          | 2.52            | 16.45         | 124.7          | Phe       |
| 12.37         | 12.37           | 0.105          | 5.05            | 40.34         | 165.5          | Lys       |
| <b>Total:</b> |                 |                | 18.292          | 133.923       | 1154.80        |           |

**HPLC-trace for analysis of the bead of catalytic dendrimer L2K4 identified as catalytic.**

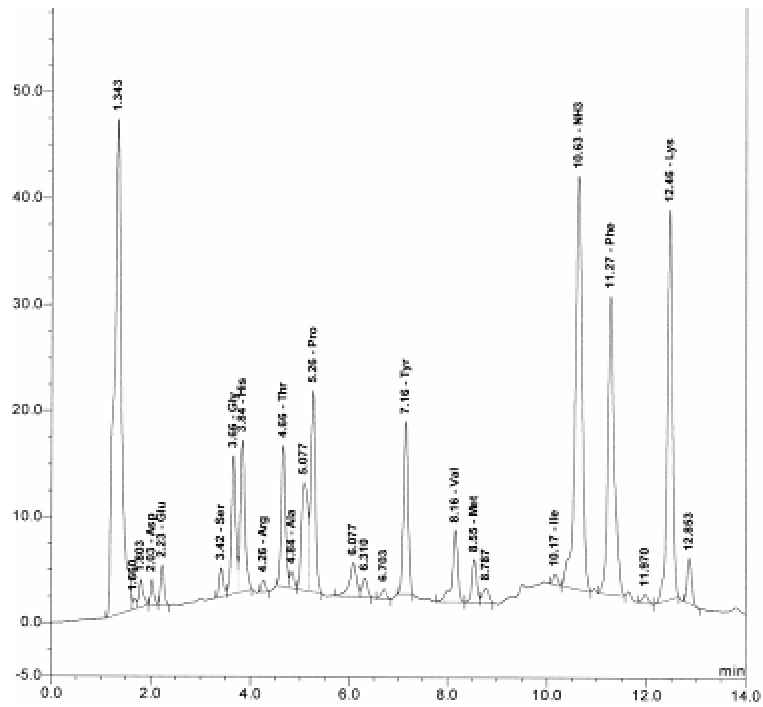

| RT<br>min     | RT (STD)<br>min | PW(50%)<br>min | Area<br>mAU*min | Height<br>mAU | Amount<br>pmol | Peak Name |
|---------------|-----------------|----------------|-----------------|---------------|----------------|-----------|
| 2.03          | 2.03            | 0.065          | 0.18            | 2.35          | 6.5            | Asp       |
| 2.23          | 2.23            | 0.074          | 0.30            | 3.73          | 6.7            | Glu       |
| 3.42          | 3.41            | 0.084          | 0.25            | 2.70          | 8.9            | Ser       |
| 3.66          | 3.66            | 0.090          | 1.30            | 13.00         | 50.7           | Gly       |
| 3.84          | 3.83            | 0.092          | 1.51            | 14.28         | 98.8           | His       |
| 4.26          | 4.26            | 0.081          | 0.09            | 1.10          | 3.9            | Arg       |
| 4.66          | 4.66            | 0.090          | 1.32            | 13.31         | 93.7           | Thr       |
| 4.84          | 4.84            | n.a.           | 0.14            | 1.57          | 7.1            | Ala       |
| 5.26          | 5.26            | 0.096          | 1.97            | 18.92         | 134.8          | Pro       |
| 7.16          | 7.15            | 0.096          | 1.74            | 16.25         | 55.0           | Tyr       |
| 8.16          | 8.16            | 0.099          | 0.90            | 6.81          | 31.8           | Val       |
| 8.55          | 8.55            | 0.099          | 0.45            | 4.03          | 10.1           | Met       |
| 10.17         | 10.17           | 0.096          | 0.10            | 0.96          | 7.0            | Ile       |
| 10.63         | 10.63           | 0.138          | 6.23            | 38.84         | 728.7          | NH3       |
| 11.27         | 11.31           | 0.119          | 4.08            | 28.06         | 203.8          | Phe       |
| 12.46         | 12.46           | 0.104          | 4.32            | 36.59         | 150.2          | Lys       |
| <b>Total:</b> |                 |                | 24.880          | 202.502       | 1599.40        |           |

HPLC-trace for analysis of the bead of catalytic dendrimer L2K7 identified as catalytic.

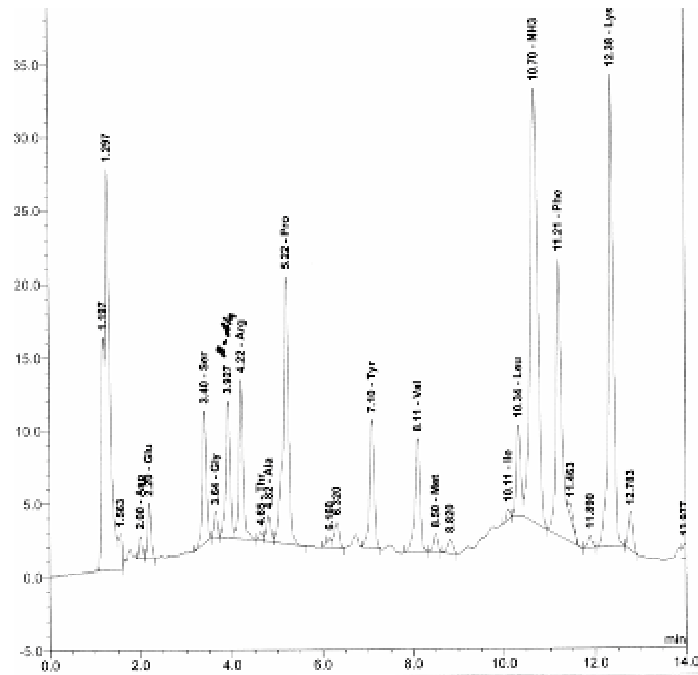

| RT<br>min     | RT (STD)<br>min | PW(50%)<br>min | Area<br>mAU*min | Height<br>mAU | Amount<br>pmol | Peak Name |
|---------------|-----------------|----------------|-----------------|---------------|----------------|-----------|
| 2.00          | 2.00            | 0.071          | 0.11            | 1.49          | 8.0            | Asp       |
| 2.20          | 2.20            | 0.076          | 0.32            | 3.76          | 22.1           | Glu       |
| 3.40          | 3.40            | 0.089          | 0.91            | 9.05          | 62.6           | Ser       |
| 3.64          | 3.64            | 0.084          | 0.16            | 1.78          | 11.8           | Gly       |
| 4.22          | 4.22            | 0.091          | 1.17            | 10.93         | 75.3           | Arg       |
| 4.65          | 4.63            | 0.111          | 0.06            | 0.54          | 4.3            | Thr       |
| 4.82          | 4.81            | 0.101          | 0.20            | 1.76          | 12.5           | Ala       |
| 5.22          | 5.22            | 0.104          | 2.57            | 18.30         | 112.5          | Pro       |
| 7.10          | 7.09            | 0.105          | 1.06            | 8.80          | 62.1           | Tyr       |
| 8.11          | 8.10            | 0.108          | 1.02            | 7.79          | 56.4           | Val       |
| 8.50          | 8.49            | 0.103          | 0.14            | 1.22          | 9.6            | Met       |
| 10.11         | 10.10           | 0.085          | 0.06            | 0.74          | 5.1            | Ile       |
| 10.34         | 10.33           | 0.102          | 0.70            | 6.26          | 45.9           | Leu       |
| 10.70         | 10.69           | 0.154          | 5.12            | 29.72         | 589.3          | NH3       |
| 11.21         | 11.23           | 0.120          | 3.03            | 18.98         | 143.9          | Phe       |
| 12.38         | 12.37           | 0.107          | 4.11            | 32.25         | 132.4          | Lys       |
| <b>Total:</b> |                 |                | 20.723          | 153.370       | 1353.65        |           |

**Kinetic measurements with 6.** The kinetic measurements were carried out by using a Cytofluor II plate reader from Perseptive Biosystems ( $\lambda_{\text{ex}}= 460 \text{ nm}$ ,  $\lambda_{\text{em}}= 530 \text{ nm}$ ) at  $25 \text{ }^\circ\text{C}$ .  $200 \text{ }\mu\text{L}$  assays were followed in individual wells of round-bottom polypropylene 96-well-plates (Costar). Kinetic experiments were followed for 6 hrs. The dendrimers were stored at  $-20^\circ\text{C}$  in  $1 \text{ mM}$  stock solution in acetonitrile/water (1:1, v/v). Dendrimer stock solutions were freshly diluted to  $80.0 \text{ }\mu\text{M}$  solution in  $20 \text{ mM}$  aq. bicine buffer pH 8.5. The  $20 \text{ mM}$  bicine buffer, pH 8.5 was prepared using MilliQ deionized water. Initial reaction rates were calculated from the steepest part observed during the first 5000 sec of each curve. In a typical experiment,  $140 \text{ }\mu\text{L}$  of aq. bicine pH 8.5 ( $20 \text{ mM}$ ) were first added in a well, then  $50 \text{ }\mu\text{L}$  of a dendrimer solution ( $80.0 \text{ }\mu\text{M}$  in aq. bicine pH 8.5, concentration in the well:  $20 \text{ }\mu\text{M}$ ), and last  $10 \text{ }\mu\text{L}$  of substrate solution ( $1.0 \text{ mM}$  in aq. bicine buffer pH=8.5/acetonitrile (10:1, v/v), concentration in the well:  $50 \text{ }\mu\text{M}$ ). Fluorescence data were converted to product concentration by means of a calibration curve with pure product. The initial reaction rates observed under these conditions is the apparent rate  $V_{\text{app}}$ .  $V_{\text{uncat}}$  is the initial rate observed under the same conditions without dendrimer. Michaelis-Menten parameters were obtained from the linear double reciprocal plot of  $1/V_{\text{net}}$  ( $V_{\text{net}} = V_{\text{app}} - V_{\text{uncat}}$ ) vs.  $1/[\text{S}]$  measured similarly with  $20 \text{ }\mu\text{M}$  dendrimer ( $V_{\text{app}}$ ) or no dendrimer ( $V_{\text{uncat}}$ ) and  $20, 50, 100, 200, 500 \text{ }\mu\text{M}$  substrate. The catalytic rate constant  $k_{\text{cat}}$  for the hydrolysis is given by  $k_{\text{cat}} = V_{\text{max}}/[\text{D}]$ , where  $[\text{D}]$  indicates the concentration of dendrimers. The second order rate constants  $k_2$  were calculated from linear regression of the experimentally measured pseudo first order rate constants  $k'$  as a function of proline or lysine concentration.

Double-reciprocal Lineweaver-Burk plot for dendrimer catalyzed reactions with ketone 6. Conditions: 20  $\mu\text{M}$  dendrimer, 20, 50, 100, 200 and 500  $\mu\text{M}$  ketone 6 in 20 mM aq. bicine buffer pH=8.5.

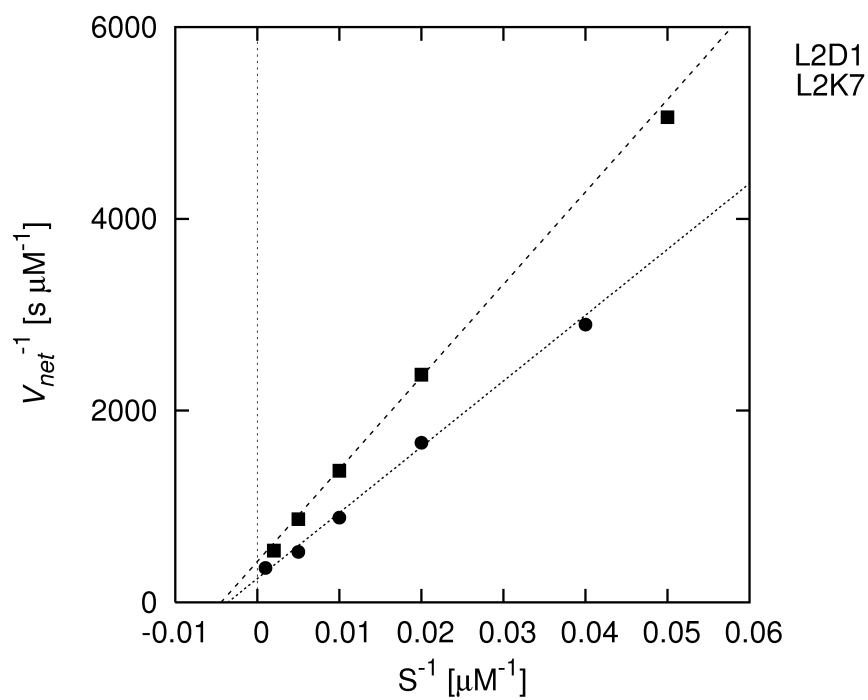

**Kinetic parameters for reaction with coumarin probe 6 with peptide dendrimers from library L2, regular series R1 and R2 and aldolase antibody 38C2.[a]**

| Catalyst             |             | $k_{\text{cat}}$ ( $\text{s}^{-1}$ ) | $K_{\text{M}}$ ( $\mu\text{M}$ ) | $k_{\text{cat}}/k_{\text{uncat}}$ | $k_{\text{cat}}/K_{\text{M}}$ ( $\text{s}^{-1} \mu\text{M}^{-1}$ ) | $(k_{\text{cat}}/K_{\text{M}})/k_2$ |
|----------------------|-------------|--------------------------------------|----------------------------------|-----------------------------------|--------------------------------------------------------------------|-------------------------------------|
| PK.PK.YL.IG          | <b>L2D1</b> | $1.2 \times 10^{-4}$                 | 230                              | 56                                | $5.2 \times 10^{-7}$                                               | 5'900                               |
| EK.SK.YA.FV          | <b>L2D5</b> | $2.0 \times 10^{-4}$                 | 460                              | 98                                | $4.3 \times 10^{-7}$                                               | 4'300 <sup>[b]</sup>                |
| SK.SK.YG.FG          | <b>L2D6</b> | $1.1 \times 10^{-4}$                 | 140                              | 51                                | $7.5 \times 10^{-7}$                                               | 7'400 <sup>[b]</sup>                |
| PK.ER.βAG.FV         | <b>L2D7</b> | $2.0 \times 10^{-4}$                 | 340                              | 92                                | $3.6 \times 10^{-7}$                                               | 6'500                               |
| PK.TH.TG.FV          | <b>L2K4</b> | $2.4 \times 10^{-4}$                 | 380                              | 120                               | $6.3 \times 10^{-7}$                                               | 7'200                               |
| PK.SR.βAV.YL         | <b>L2K7</b> | $2.0 \times 10^{-4}$                 | 280                              | 96                                | $7.3 \times 10^{-7}$                                               | 8'300                               |
| EK.ED.IG.YA          | <b>L2K8</b> | $3.0 \times 10^{-4}$                 | 820                              | 150                               | $3.7 \times 10^{-7}$                                               | 3'700 <sup>[b]</sup>                |
| PT.PT                | <b>R1G1</b> | $9.3 \times 10^{-5}$                 | 210                              | 45                                | $4.4 \times 10^{-7}$                                               | 5'000                               |
| PT.PT.PT             | <b>R1G2</b> | $9.4 \times 10^{-5}$                 | 160                              | 45                                | $6.0 \times 10^{-7}$                                               | 6'800                               |
| PT.PT.PT.PT          | <b>R1G3</b> | $1.3 \times 10^{-4}$                 | 180                              | 61                                | $7.1 \times 10^{-7}$                                               | 8'100                               |
| PK.PK                | <b>R2G1</b> | $6.3 \times 10^{-5}$                 | 530                              | 30                                | $1.2 \times 10^{-7}$                                               | 1'400                               |
| PK.PK.PK             | <b>R2G2</b> | $1.7 \times 10^{-4}$                 | 470                              | 82                                | $3.6 \times 10^{-7}$                                               | 4'100                               |
| PK.PK.PK.PK          | <b>R2G3</b> | $1.9 \times 10^{-4}$                 | 300                              | 92                                | $6.4 \times 10^{-7}$                                               | 7'300                               |
| Antibody <b>38C2</b> |             | $2.6 \times 10^{-3}$                 | 80                               | 1800                              | $3.2 \times 10^{-5}$                                               | 320'000 <sup>[b]</sup>              |

[a] Conditions: 25–500  $\mu\text{M}$  ketone **6**, 20  $\mu\text{M}$  dendrimer, 20 mM aqueous bicine buffer pH 8.5, 25°C. The kinetic constants given are derived from the linear double-reciprocal plots of  $1/V_{\text{net}}$  versus  $1/[\text{S}]$ .  $V_{\text{net}} = V_{\text{app}} - V_{\text{uncat}}$  with  $V_{\text{app}}$  being the apparent hydrolysis rate in the presence of dendrimer and  $V_{\text{uncat}}$  the hydrolysis rate in buffer alone ( $k_{\text{uncat}} = 2.1 \times 10^{-6} \text{ s}^{-1}$ ).  $k_2 = 8.8 \times 10^{-11} \mu\text{M}^{-1} \text{ s}^{-1}$  is the catalytic rate constant for  $\beta$ -elimination catalyzed by L-proline under the same conditions. [b]  $k_2 = 1.01 \times 10^{-10} \mu\text{M}^{-1} \text{ s}^{-1}$  is the catalytic rate constant for  $\beta$ -elimination catalyzed by L-lysine under the same conditions.



**6-(4-Nitro-phenyl)-hexane-2,4-dione (5)**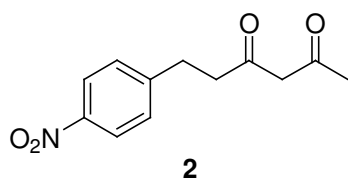

$C_{12}H_{13}NO_4$   
Mol. Wt.: 235.24

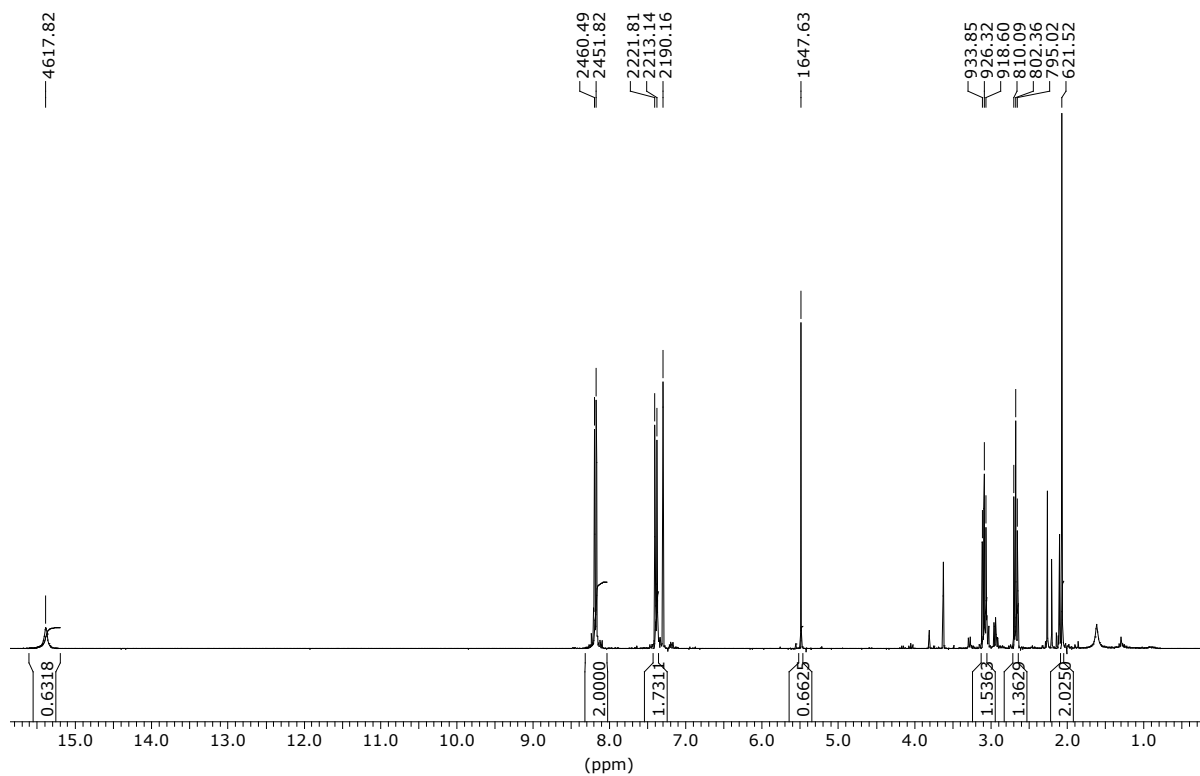

Succinic acid mono-(2-{ethyl-[4-(4-nitro-phenylazo)-phenyl]-amino}-ethyl) ester (8)

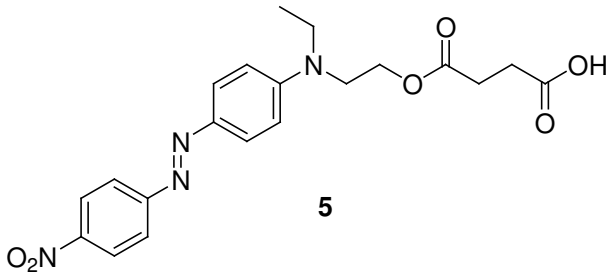

$C_{20}H_{22}N_4O_6$   
Mol. Wt.: 414.41

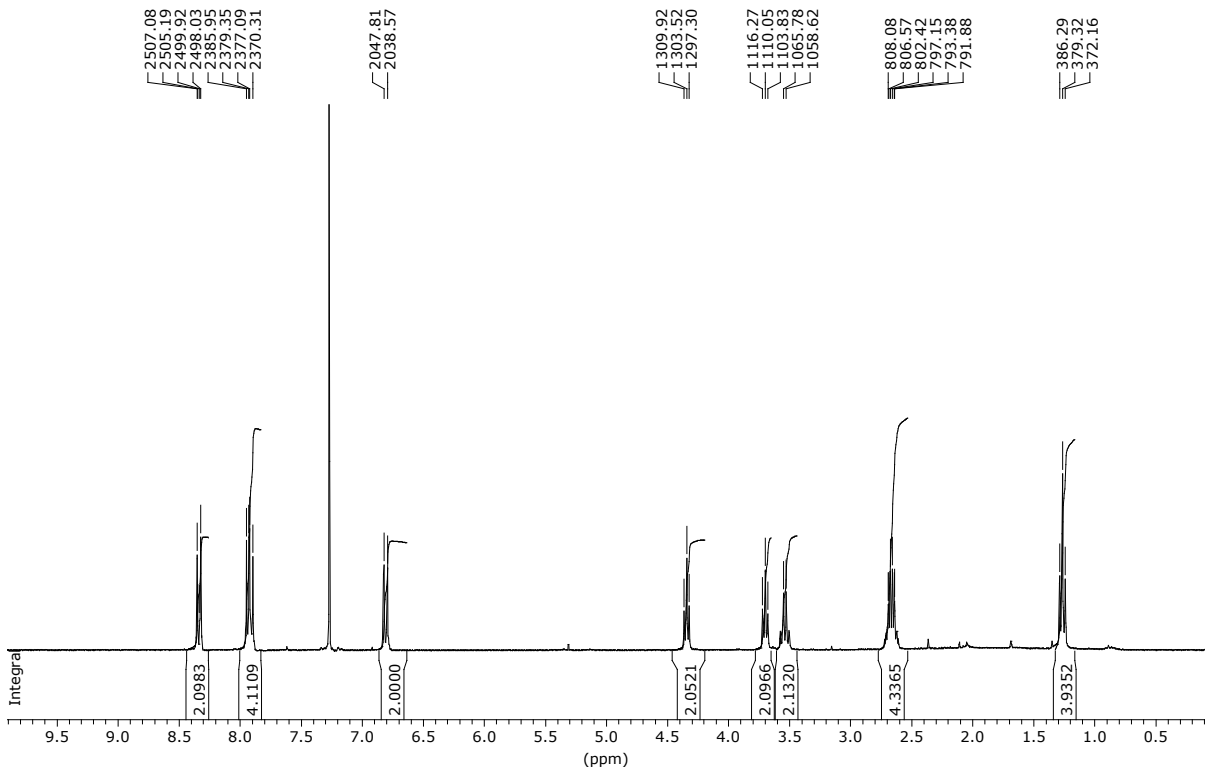

***N*-[4-(3,5-Dioxo-hexyl)-phenyl]-succinamic acid 2-{ethyl-[4-(4-nitro-phenylazo)-phenyl]-amino}-ethyl ester (**1a**)**

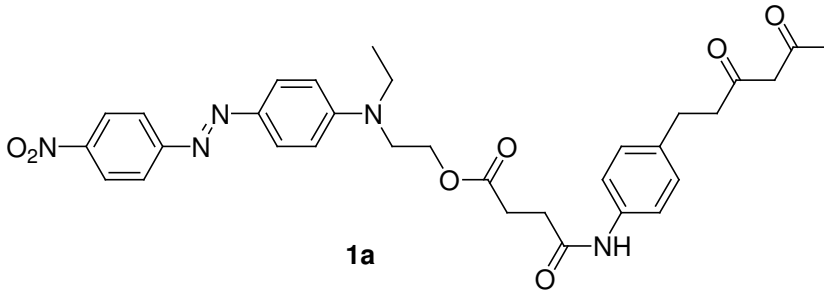

**1a**  
 $C_{32}H_{35}N_5O_7$   
 Mol. Wt.: 601.65

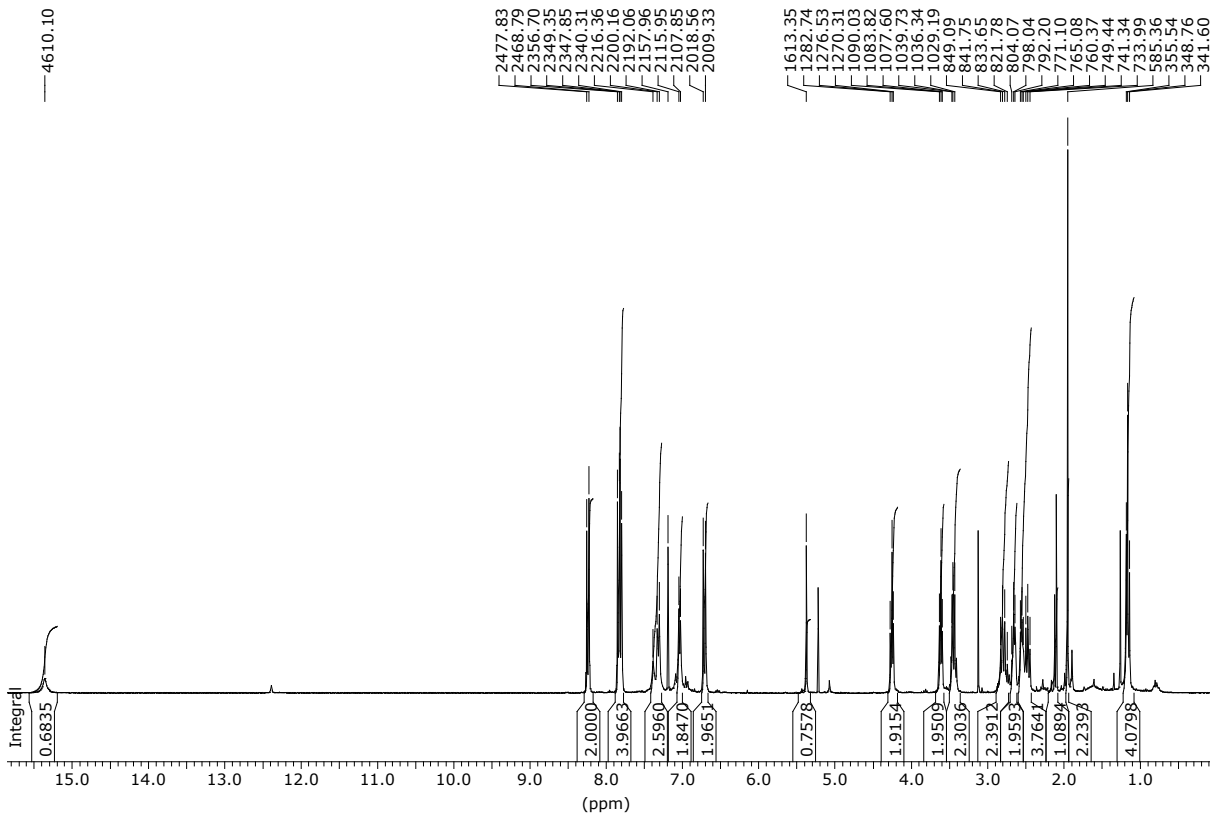

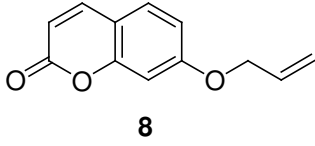

$C_{12}H_{10}O_3$   
 Mol. Wt.: 202.206  
 C, 71.28; H, 4.98; O, 23.74

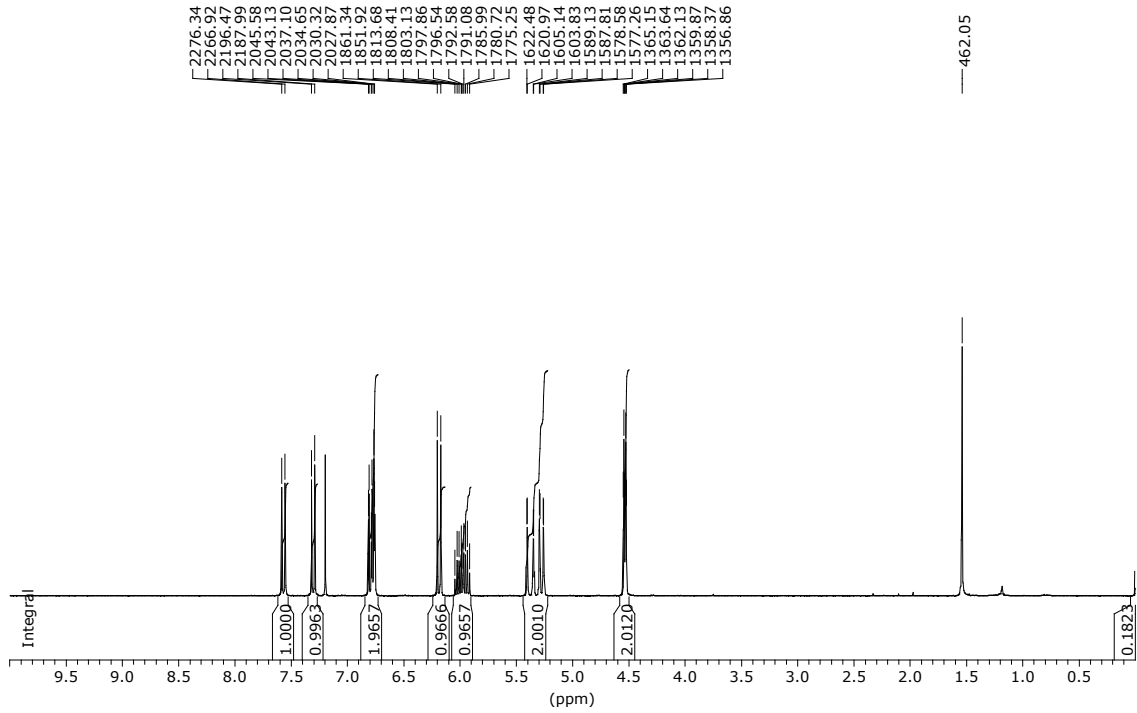

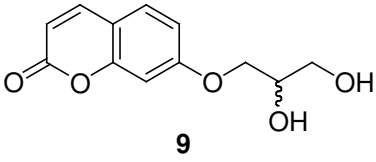

$C_{12}H_{12}O_5$   
 Mol. Wt.: 236.22068  
 C, 61.01; H, 5.12; O, 33.87

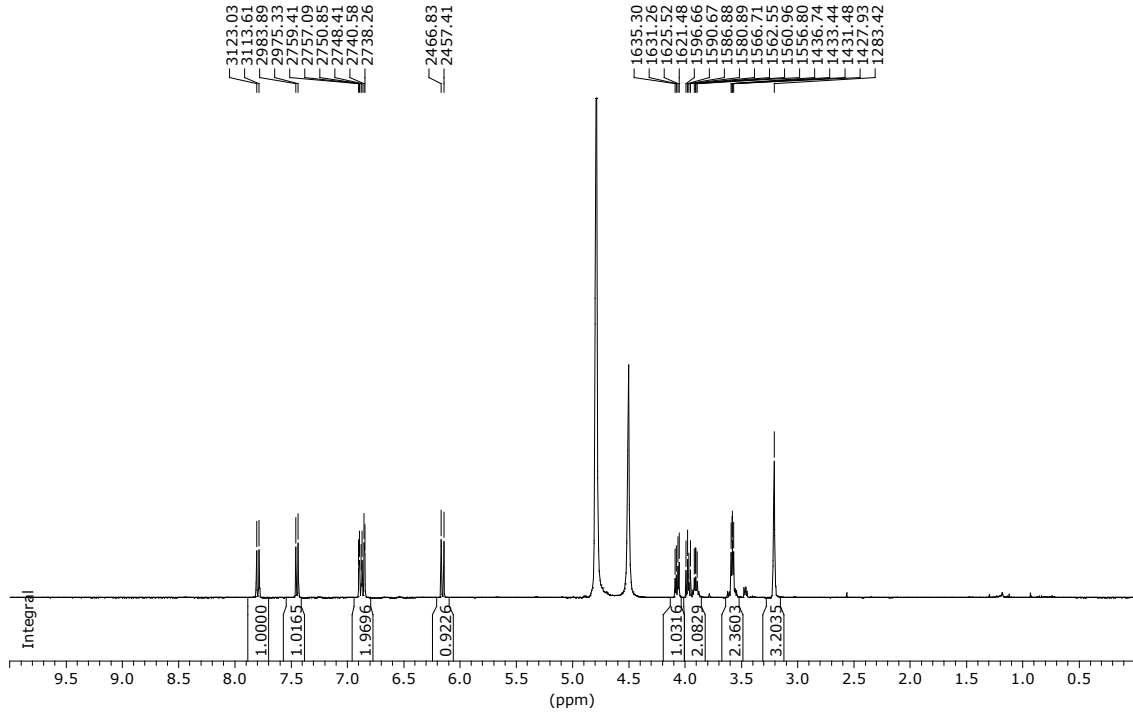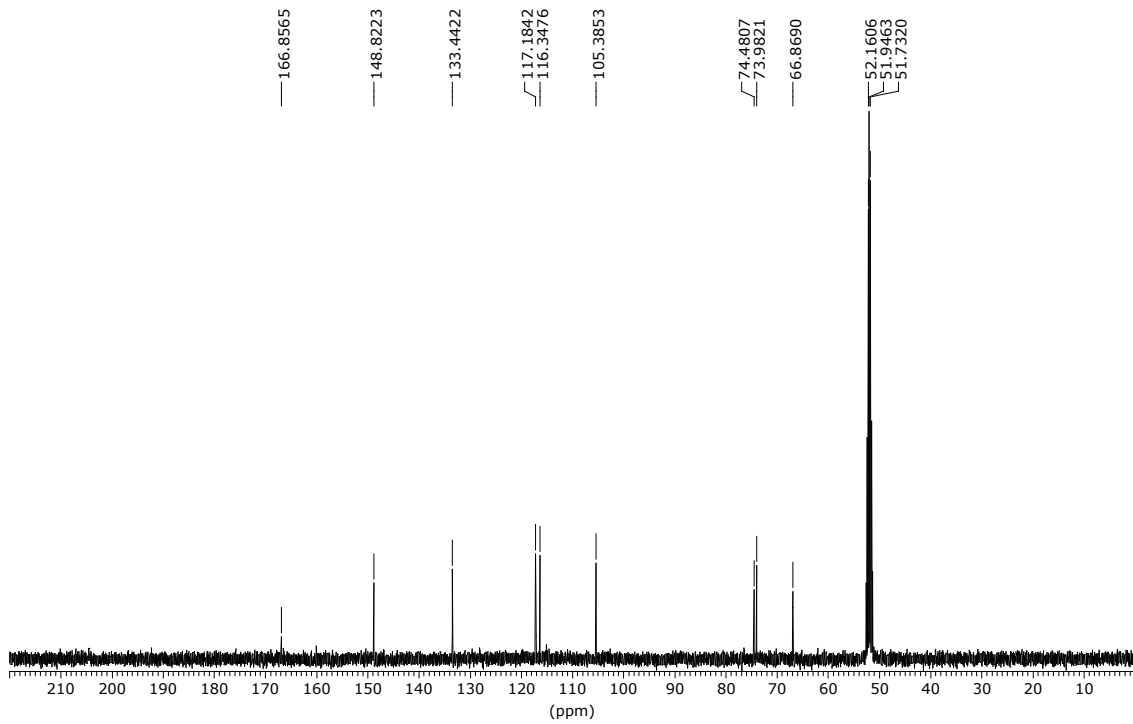

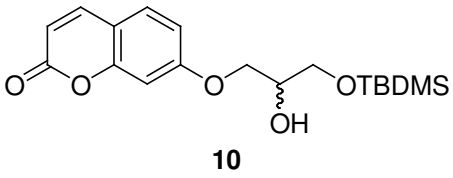

$C_{18}H_{26}O_5Si$   
 Mol. Wt.: 350.48154  
 C, 61.68; H, 7.48; O, 22.82; Si, 8.01

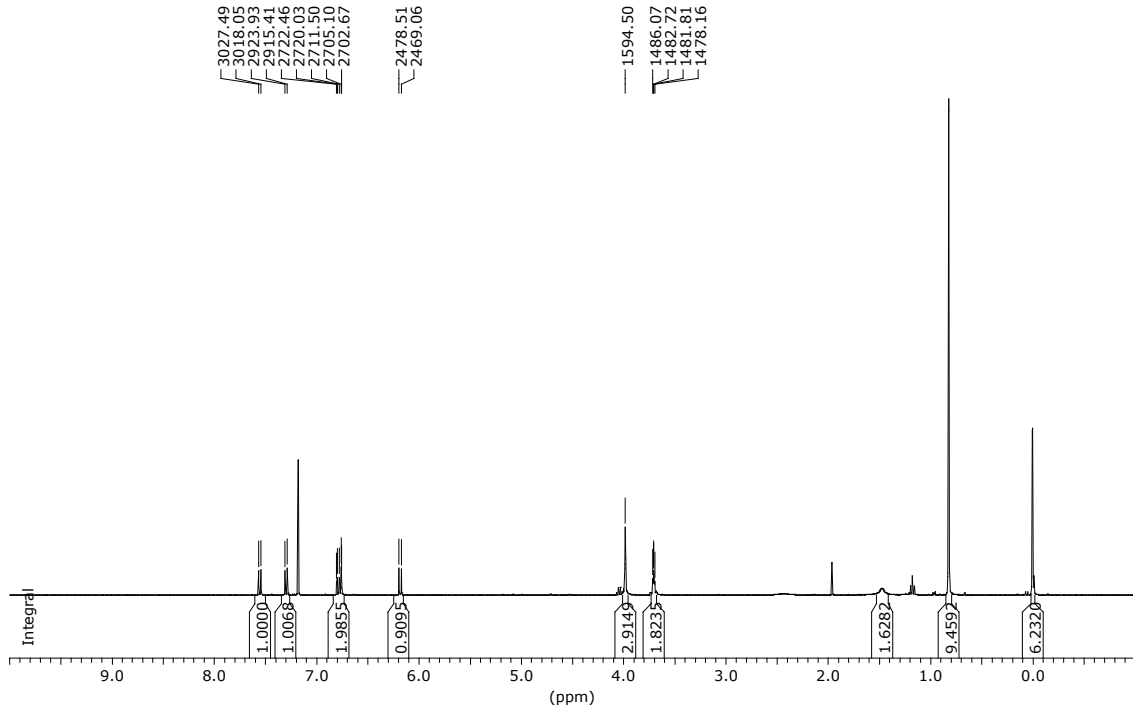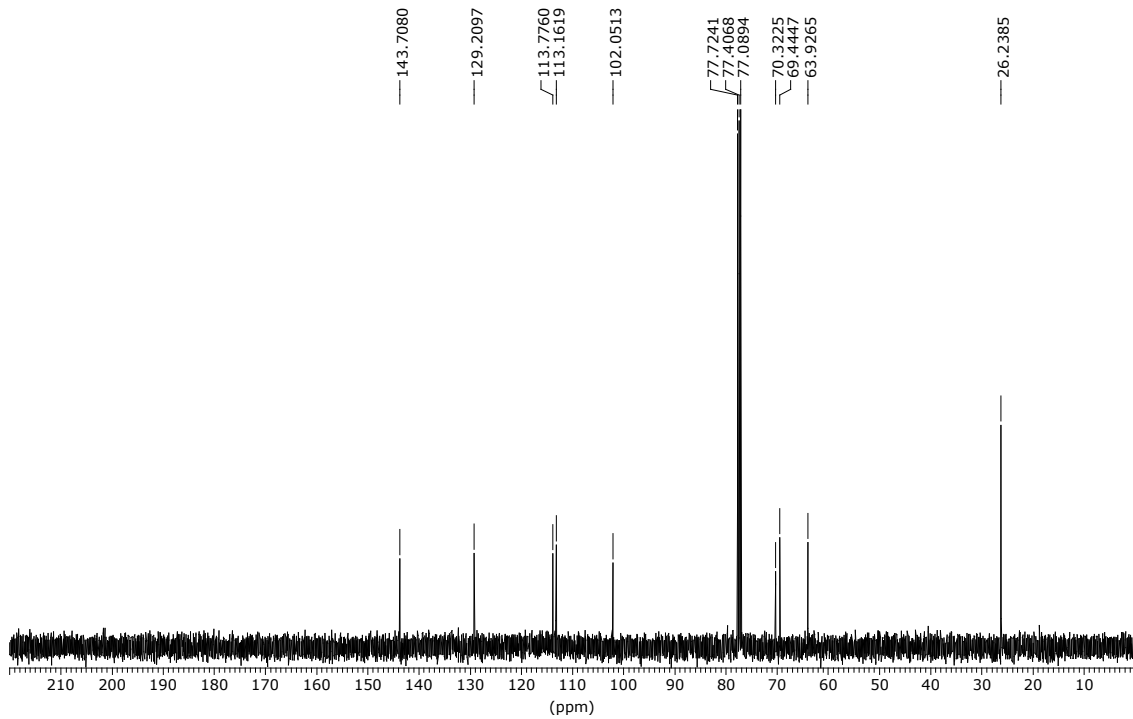

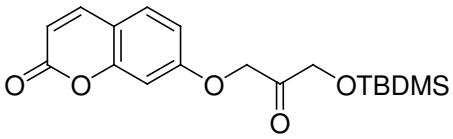

11

$C_{18}H_{24}O_5Si$   
 Mol. Wt.: 348.46566  
 C, 62.04; H, 6.94; O, 22.96; Si, 8.06

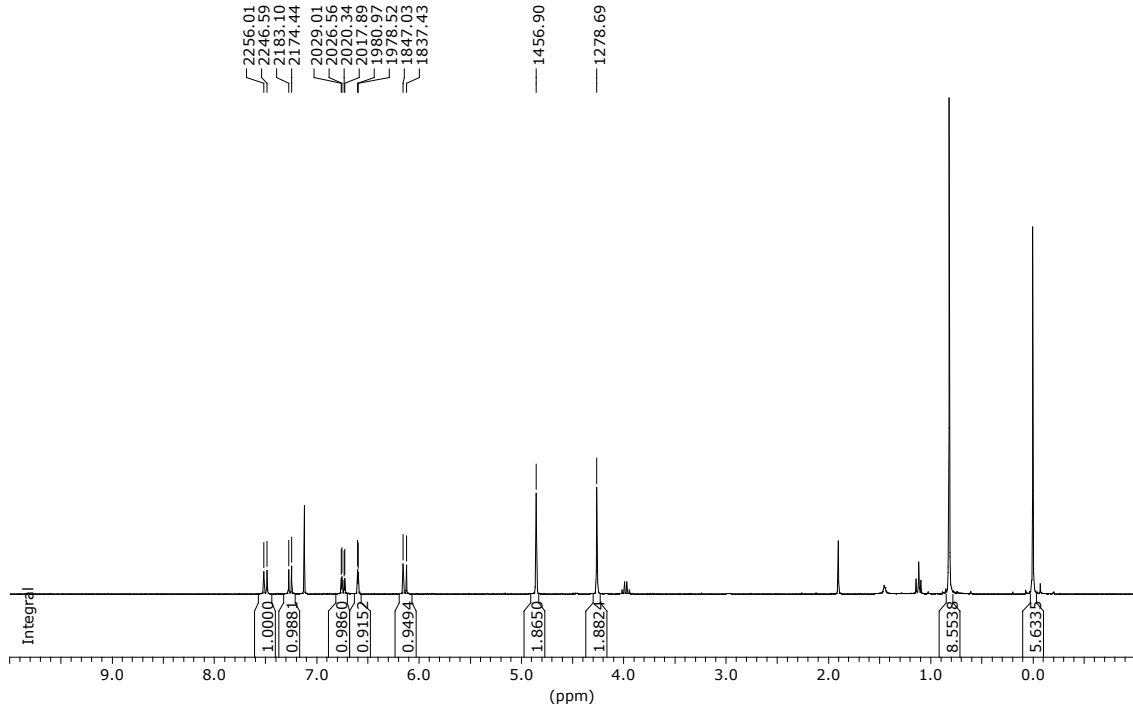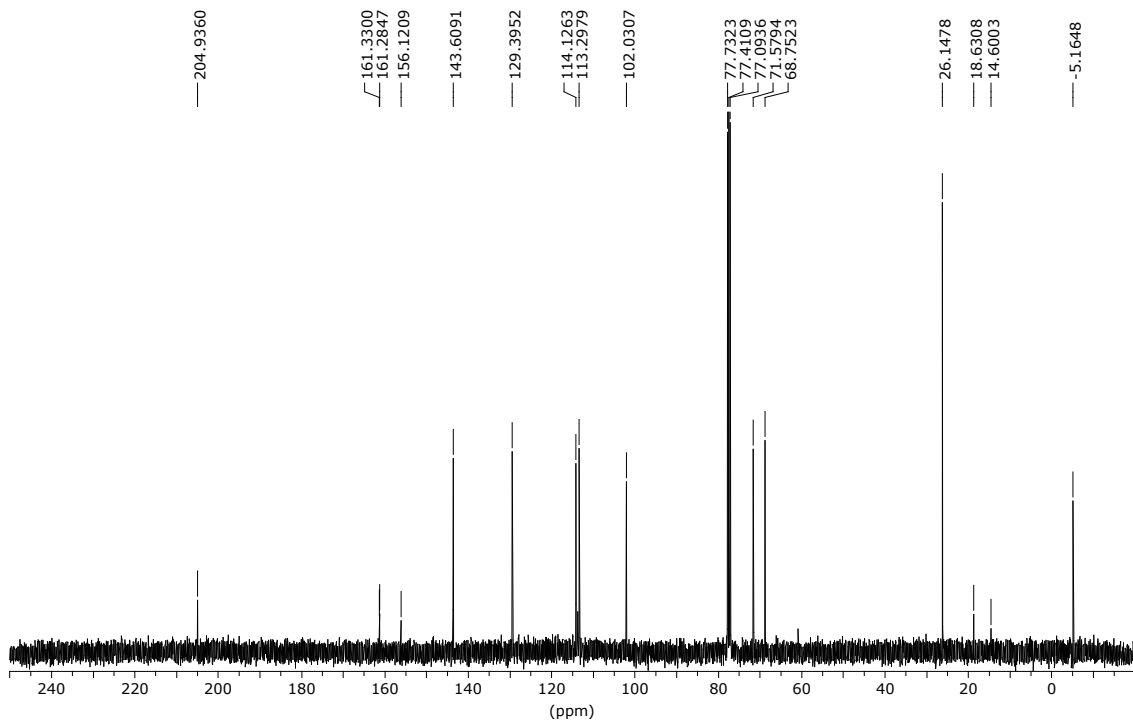

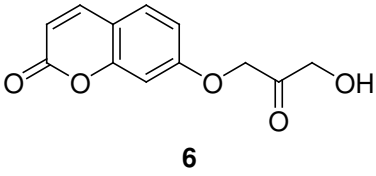

$C_{12}H_{10}O_5$   
 Mol. Wt.: 234.2048  
 C, 61.54; H, 4.30; O, 34.16

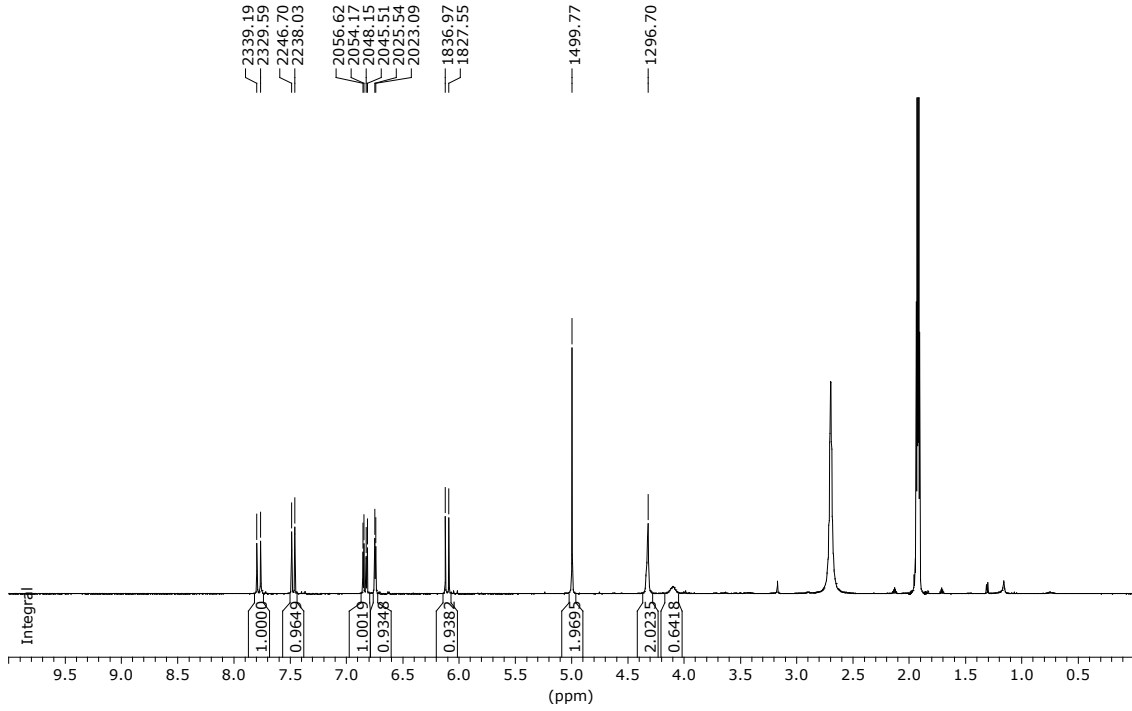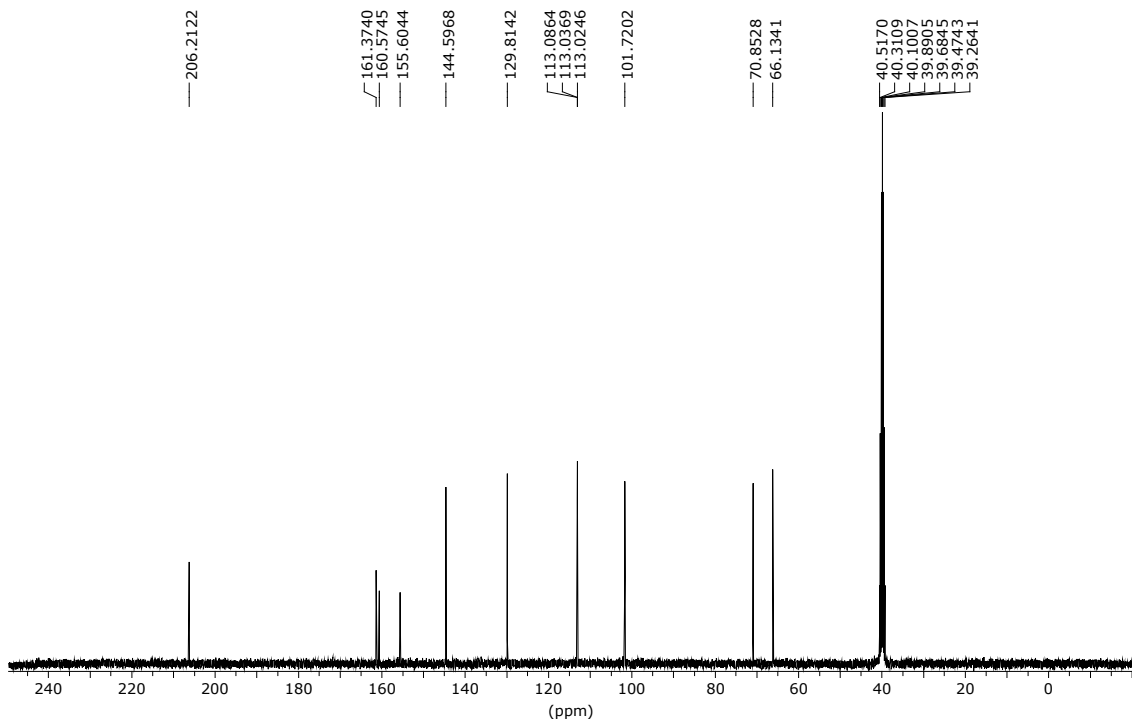



Dendrimer L1D5

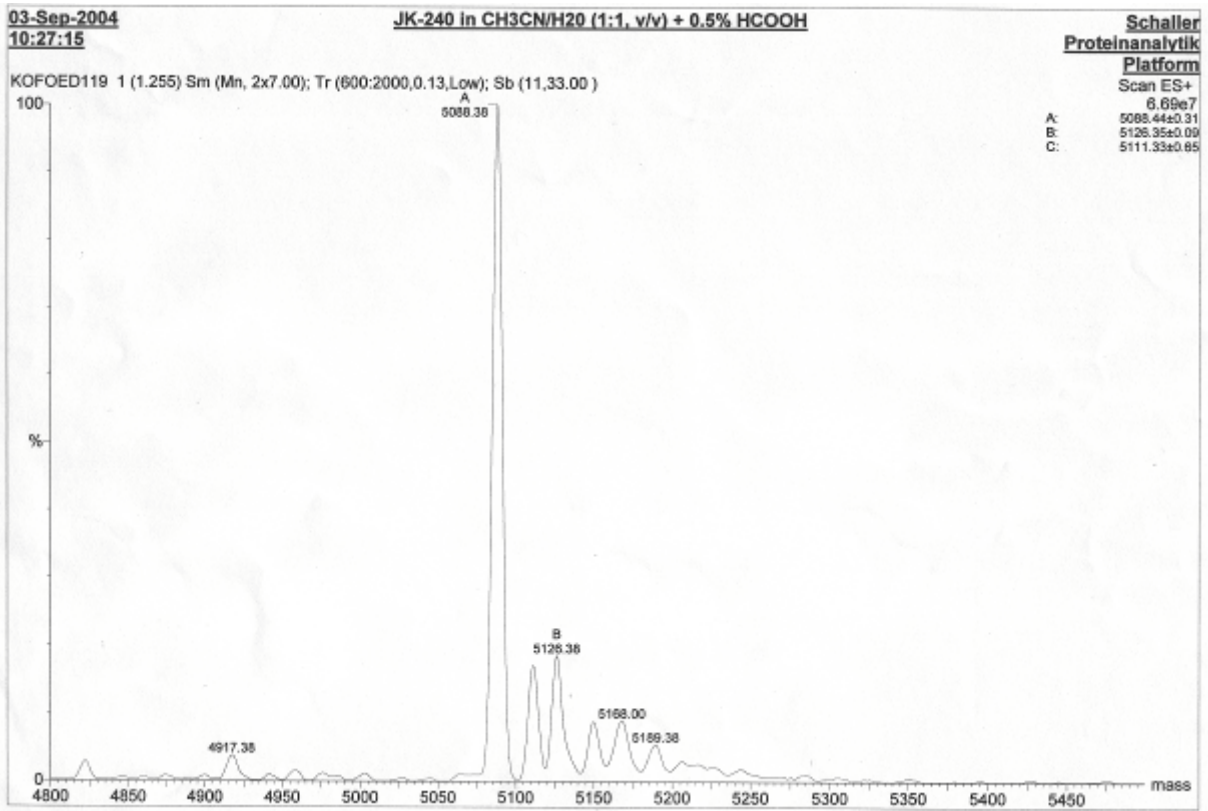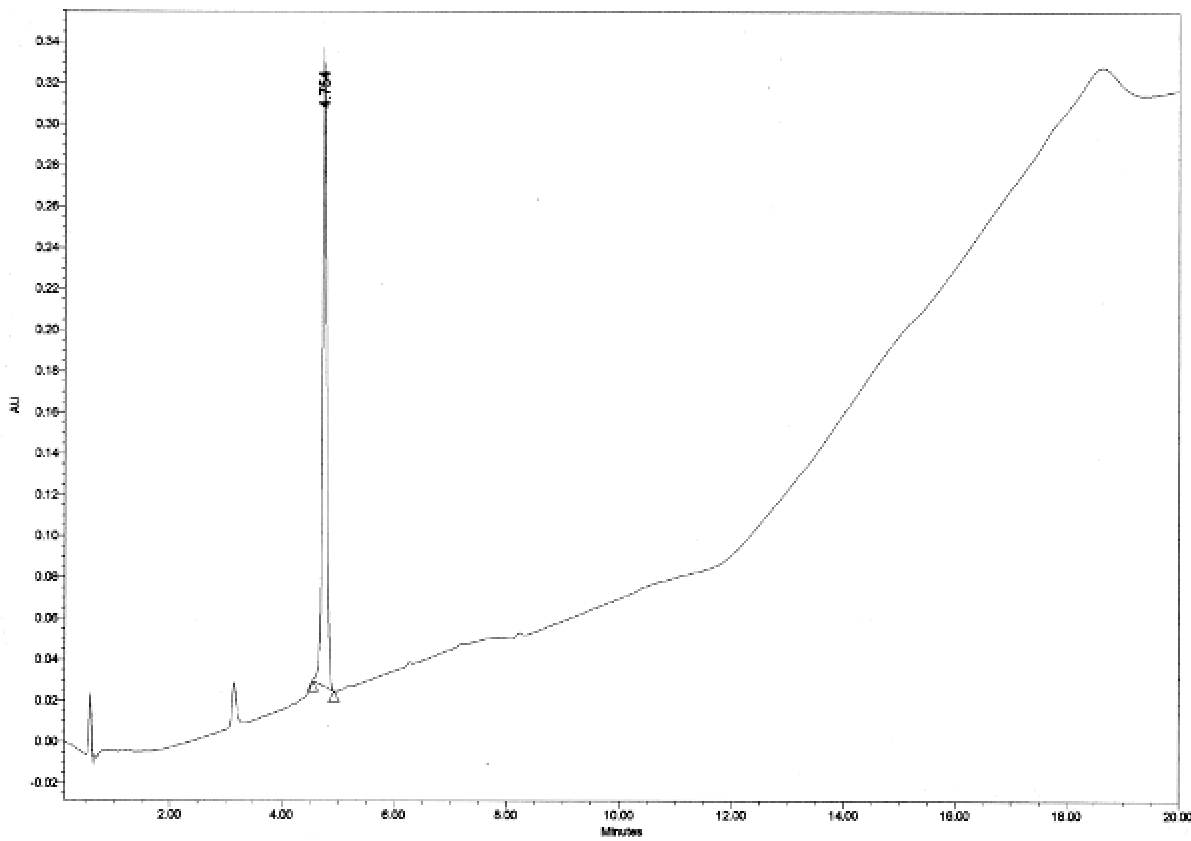

Dendrimer L1D6

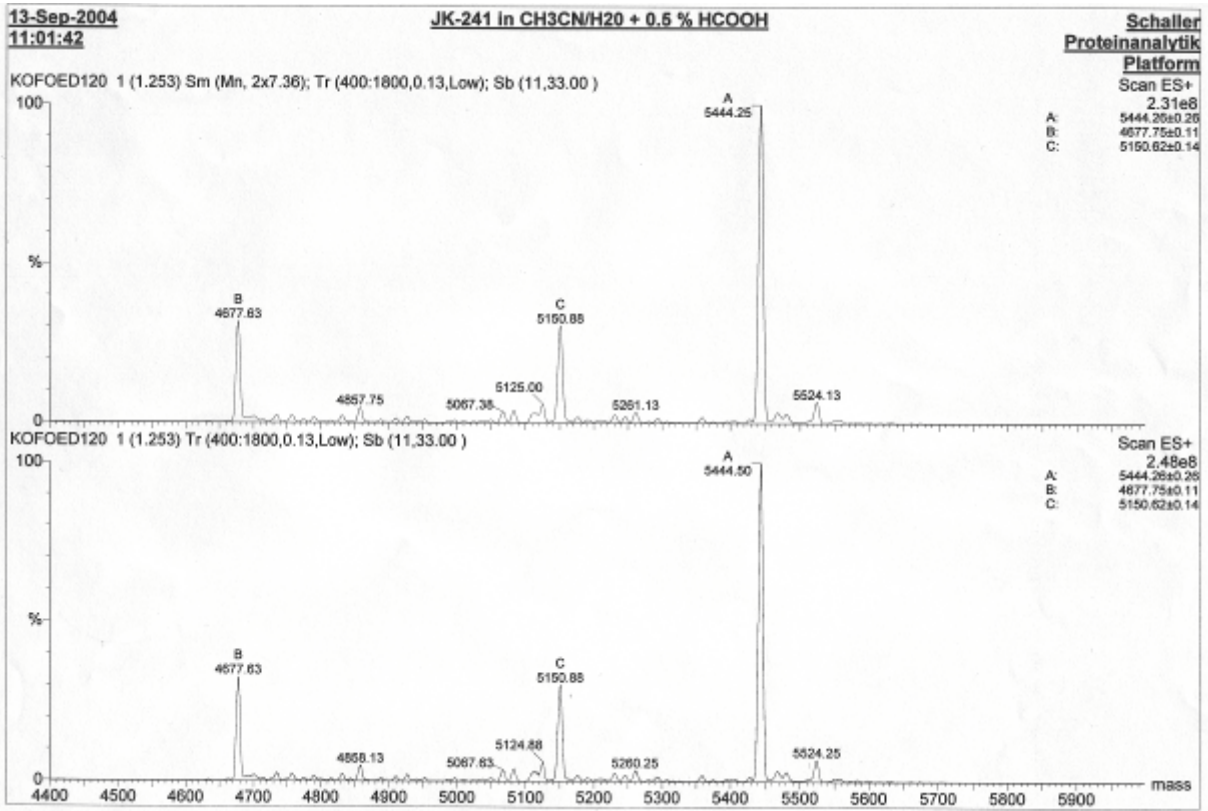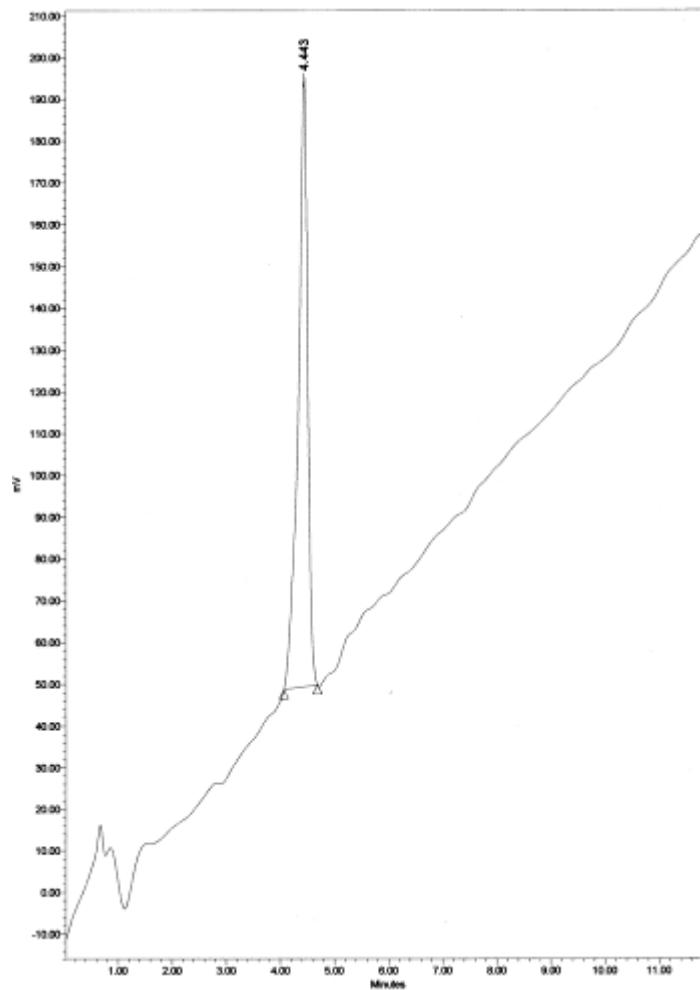

Dendrimer L2D1

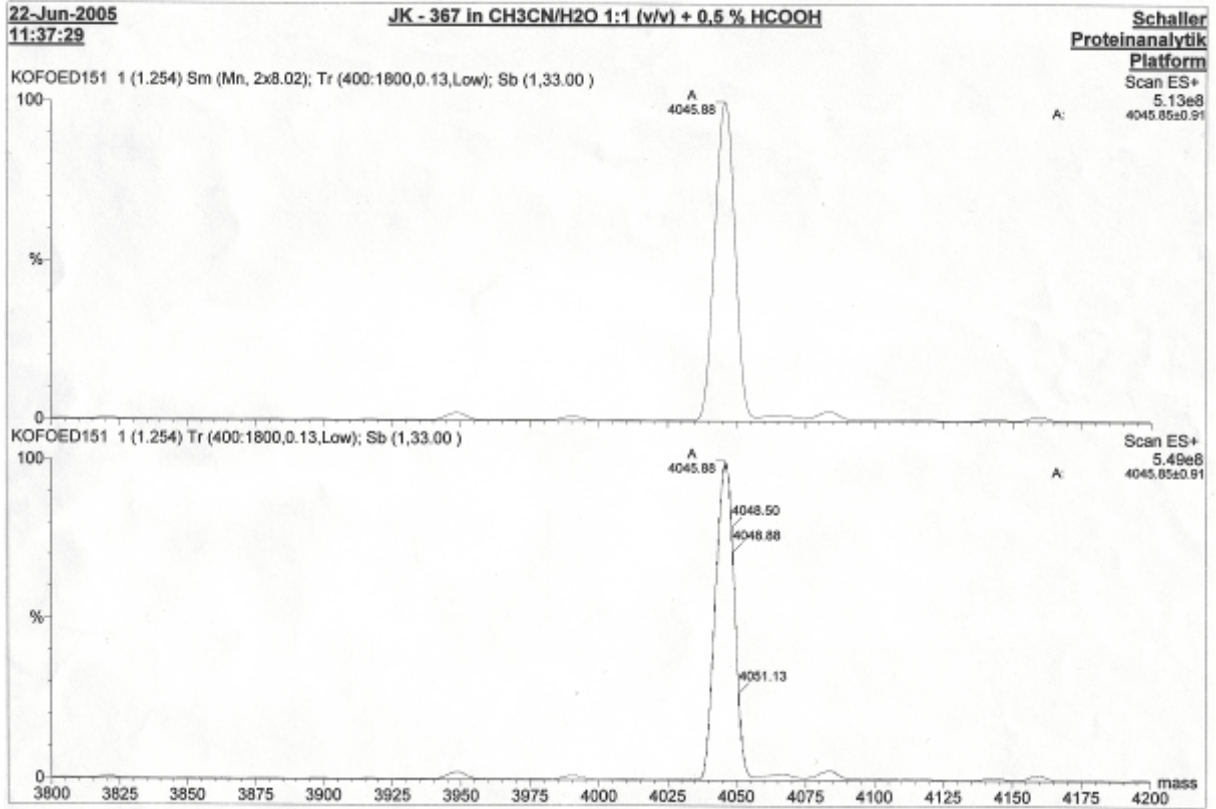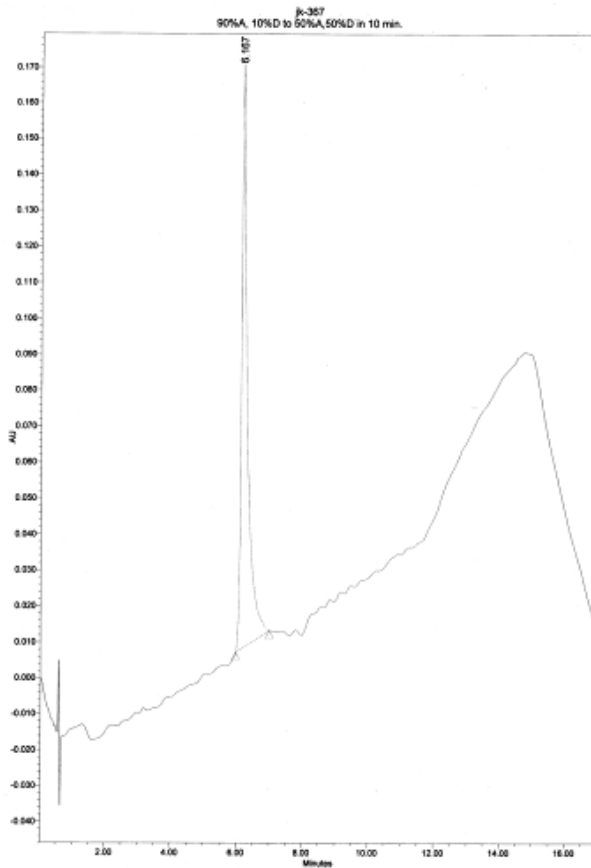

Dendrimer L2D5

Sample Name: N/A  
 Mass reconstruction of +TOF MS: 0.700 to 2.851 min from JK\_369.wiff  
 a=3.56172594560657950e-004, y0=4.69637173806758260e+000  
 ESI-MS positive mode  
 Max: 1.0 cps.

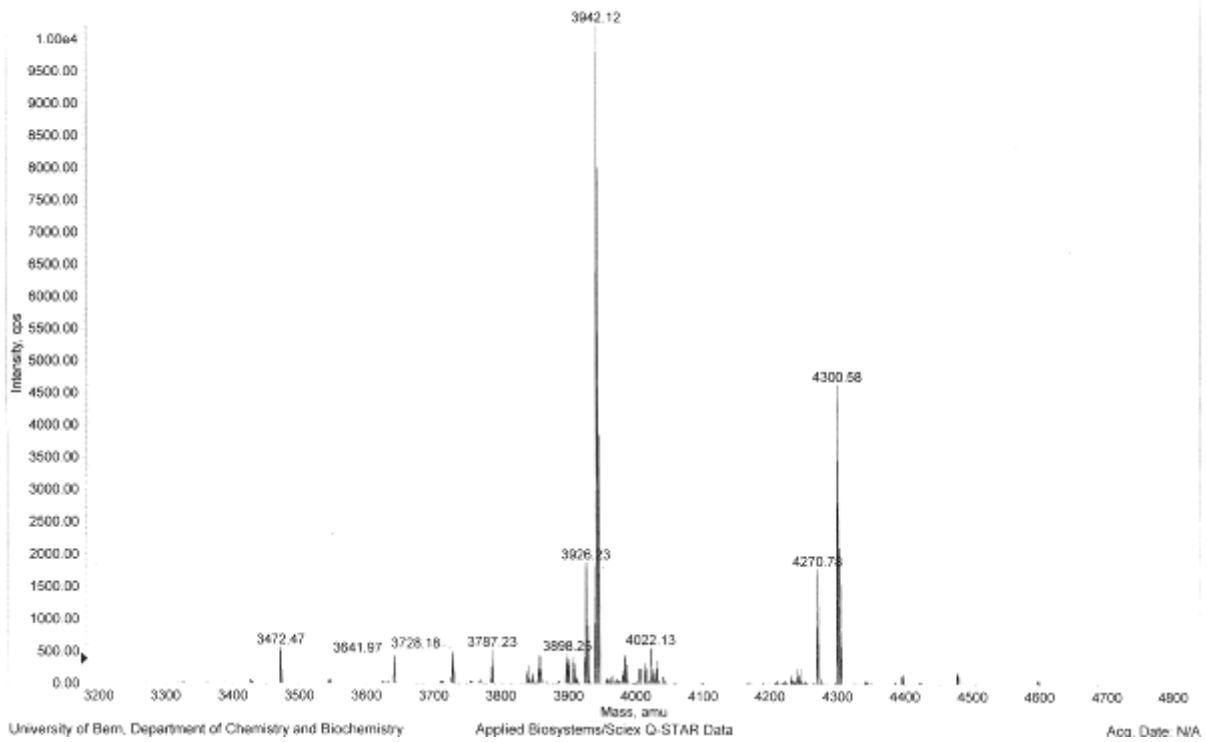

University of Bern, Department of Chemistry and Biochemistry Applied Biosystems/Sciex Q-STAR Data Acc. Date: N/A

| Time      | Flow | %A   | %B  | %C  | %D   | Curve |
|-----------|------|------|-----|-----|------|-------|
| 0.01      | 3.00 | 90.0 | 0.0 | 0.0 | 10.0 | 6     |
| 15.003.00 | 50.0 | 0.0  | 0.0 | 0.0 | 50.0 | 6     |

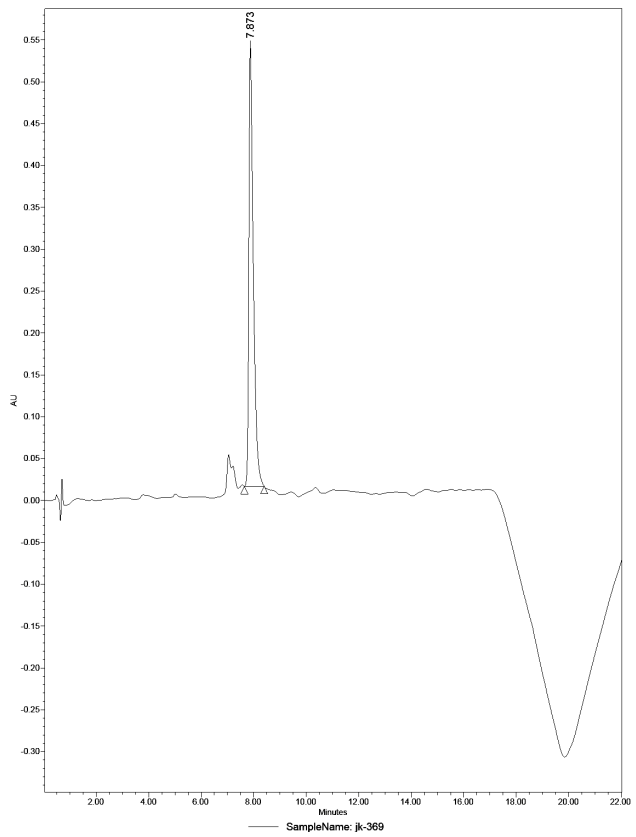

SampleName: jk-369

Dendrimer L2D6

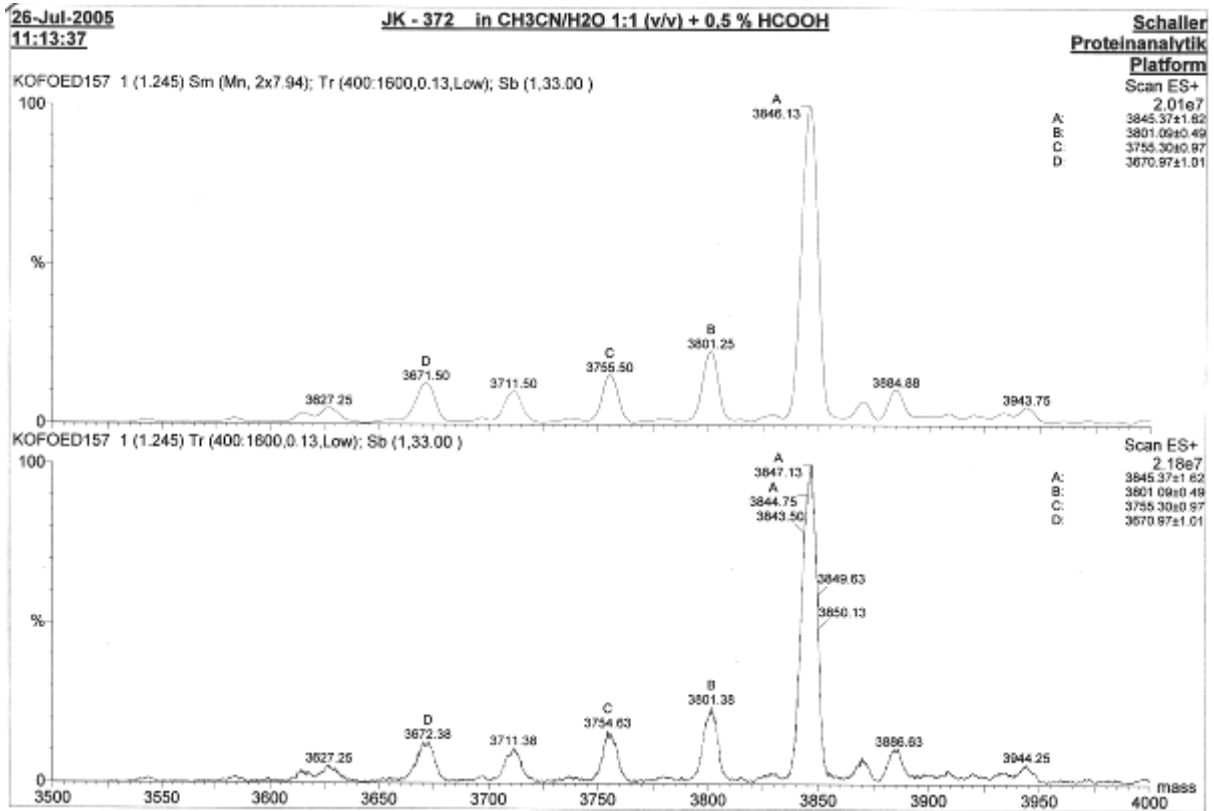

| Time      | Flow | %A   | %B  | %C  | %D   | Curve |
|-----------|------|------|-----|-----|------|-------|
| 0.01      | 3.00 | 90.0 | 0.0 | 0.0 | 10.0 | 6     |
| 15.003.00 |      | 50.0 | 0.0 | 0.0 | 50.0 | 6     |

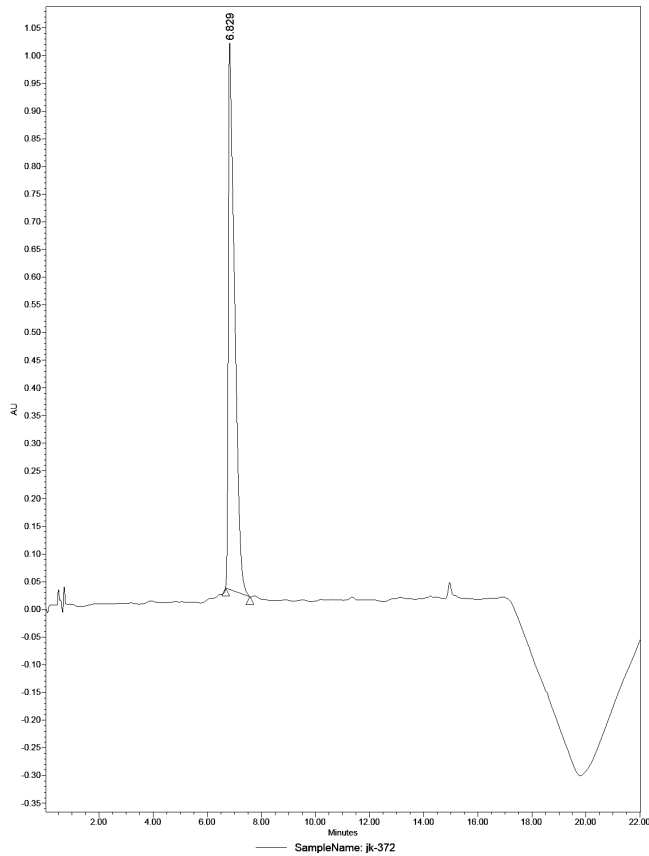

Dendrimer L2D7

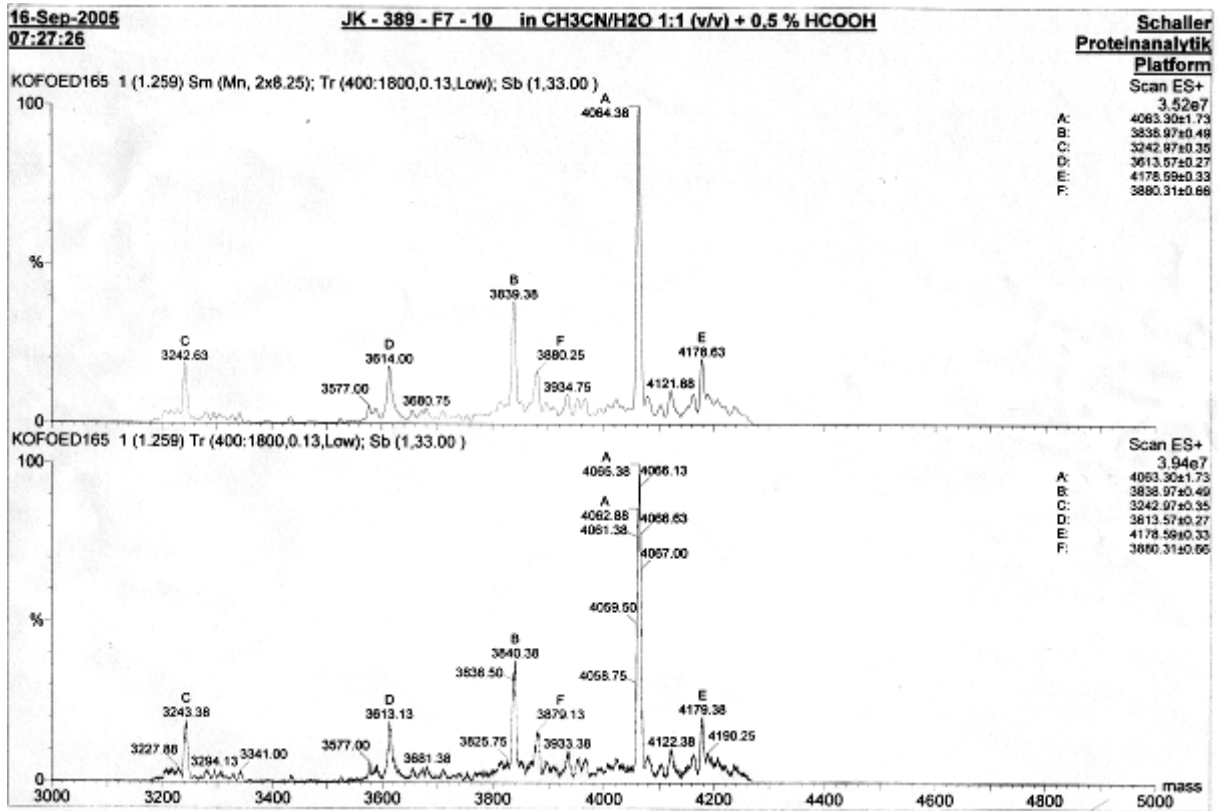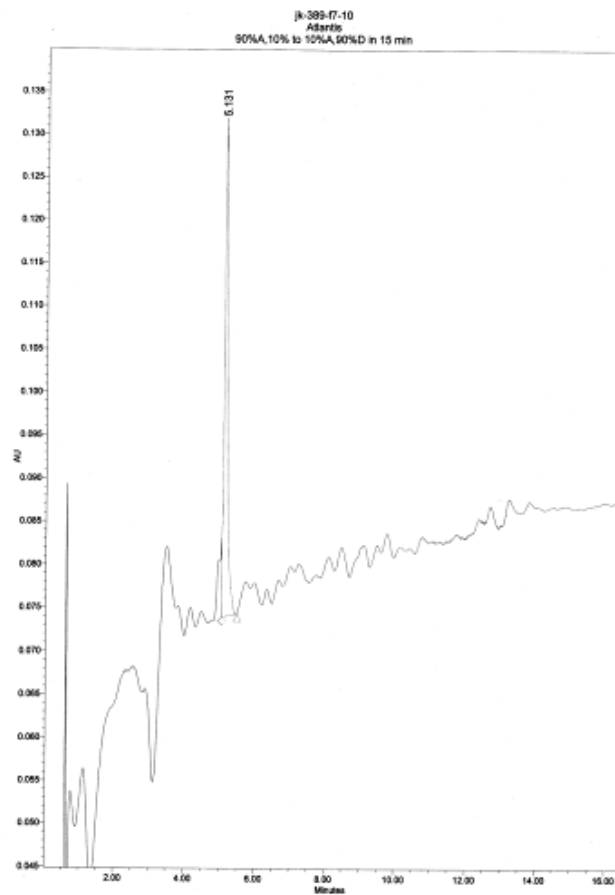

Dendrimer L2K4

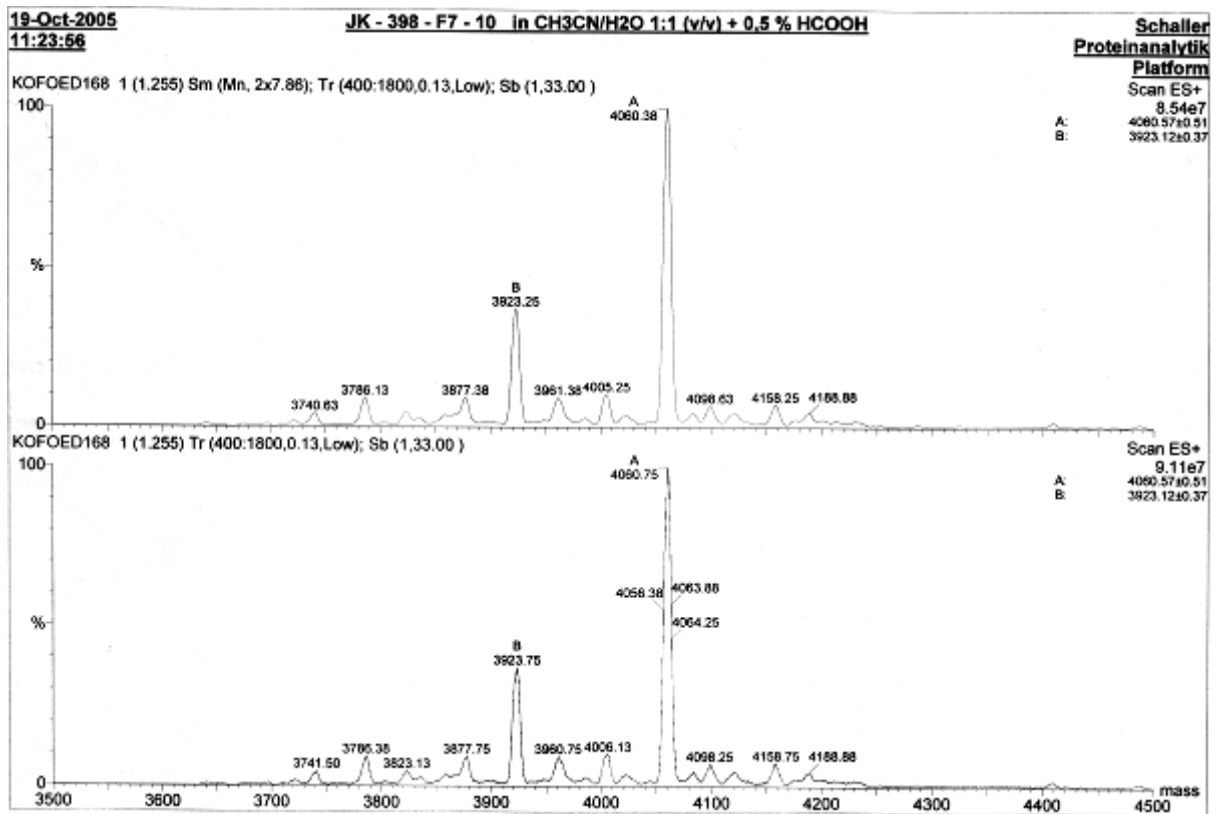

MSMS: dC18 Sam, 4.6mmx100mm

| Time | Flow  | %A   | %B   | %C  | %D  | Curve  |
|------|-------|------|------|-----|-----|--------|
| 1    | 0.00  | 3.00 | 90.0 | 0.0 | 0.0 | 10.0 6 |
| 2    | 15.00 | 3.00 | 10.0 | 0.0 | 0.0 | 90.0 6 |

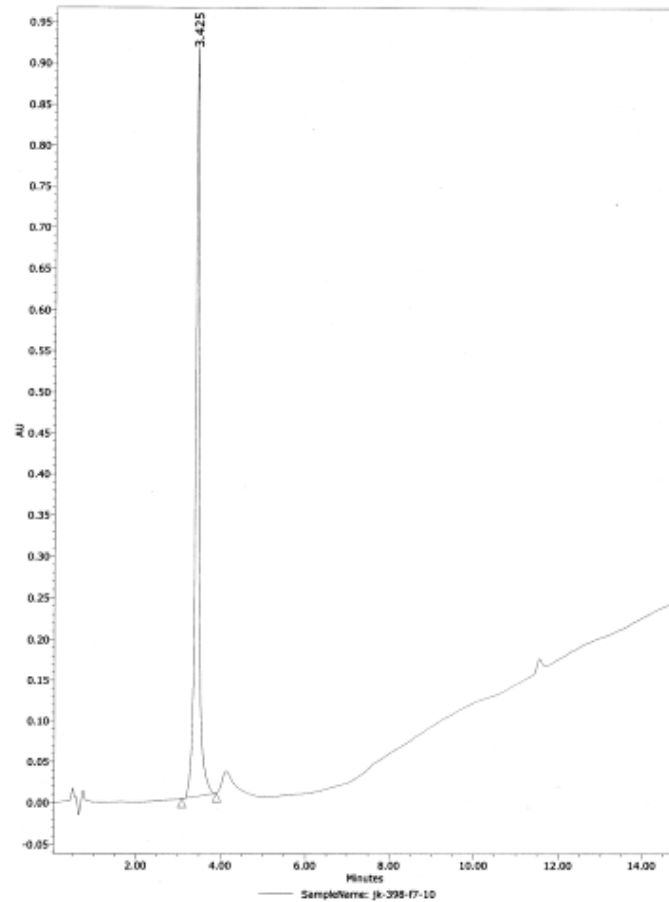

Dendrimer L2K7

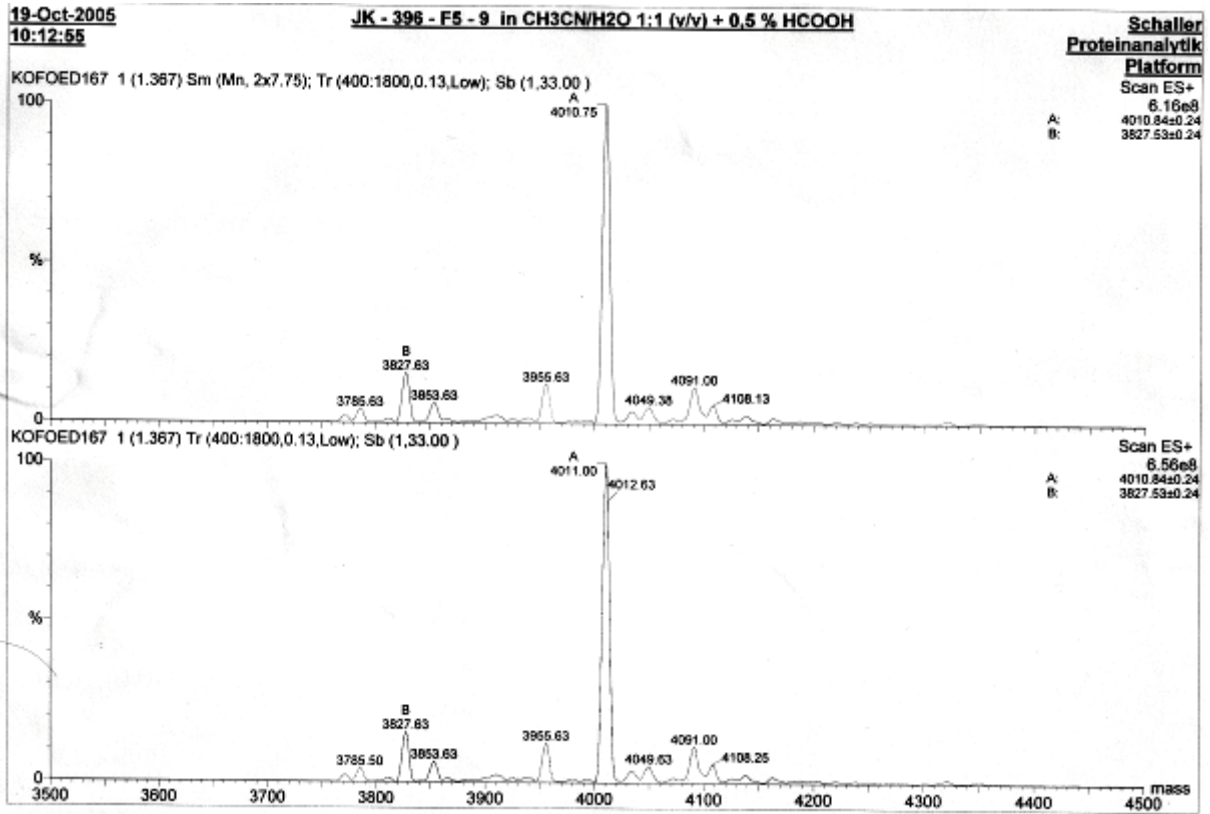

Atlantis dC18 Sun, 4.6mmx100mm

|   | Time  | Flow | %A   | %B  | %C  | %D   | Curve |
|---|-------|------|------|-----|-----|------|-------|
| 1 | 0.00  | 3.00 | 90.0 | 0.0 | 0.0 | 10.0 | 6     |
| 2 | 15.00 | 3.00 | 10.0 | 0.0 | 0.0 | 90.0 | 6     |

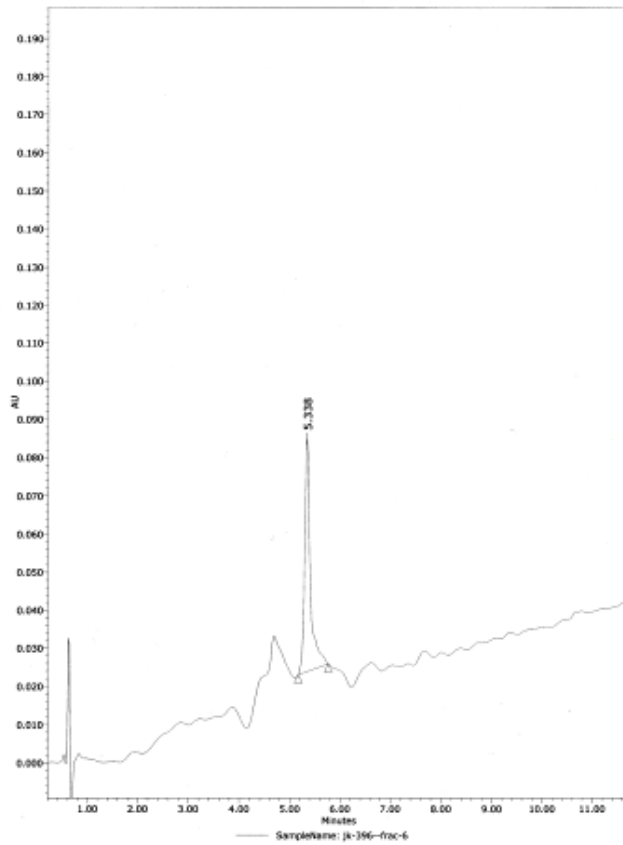



Dendrimer L2K8

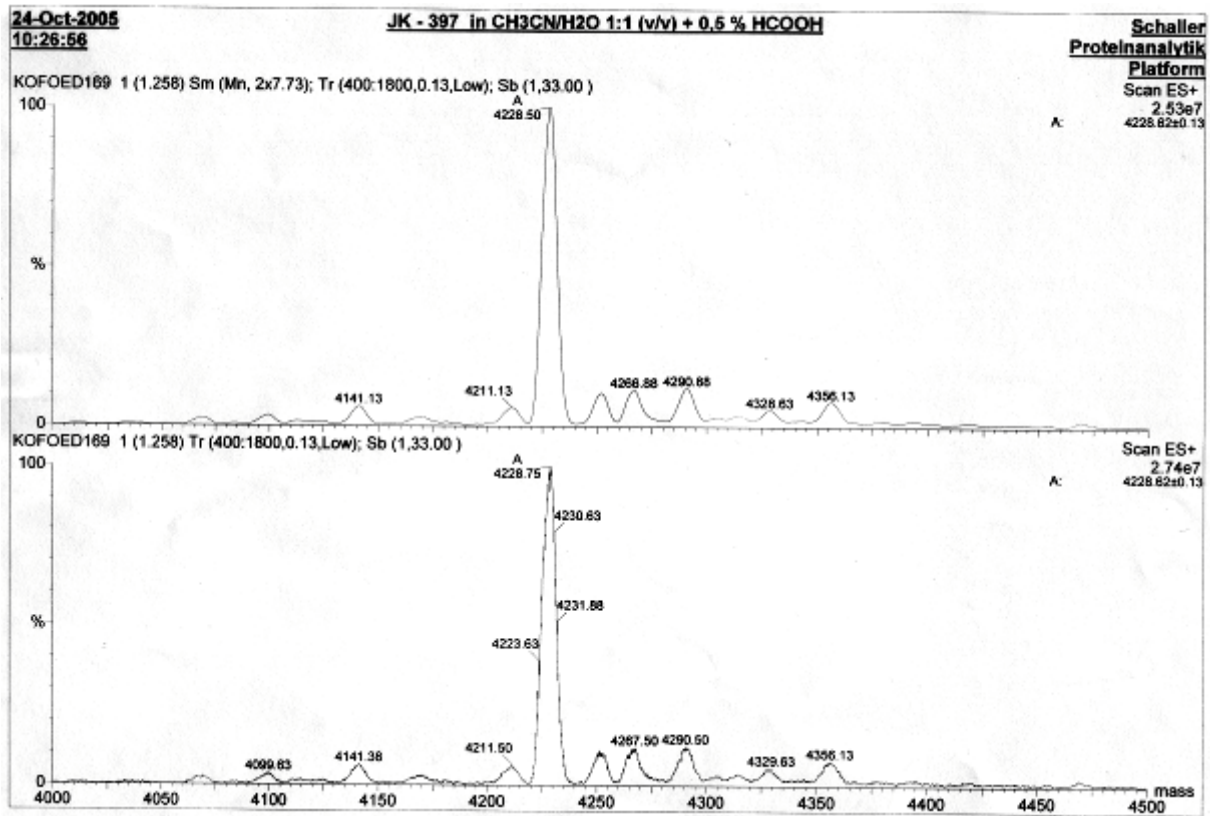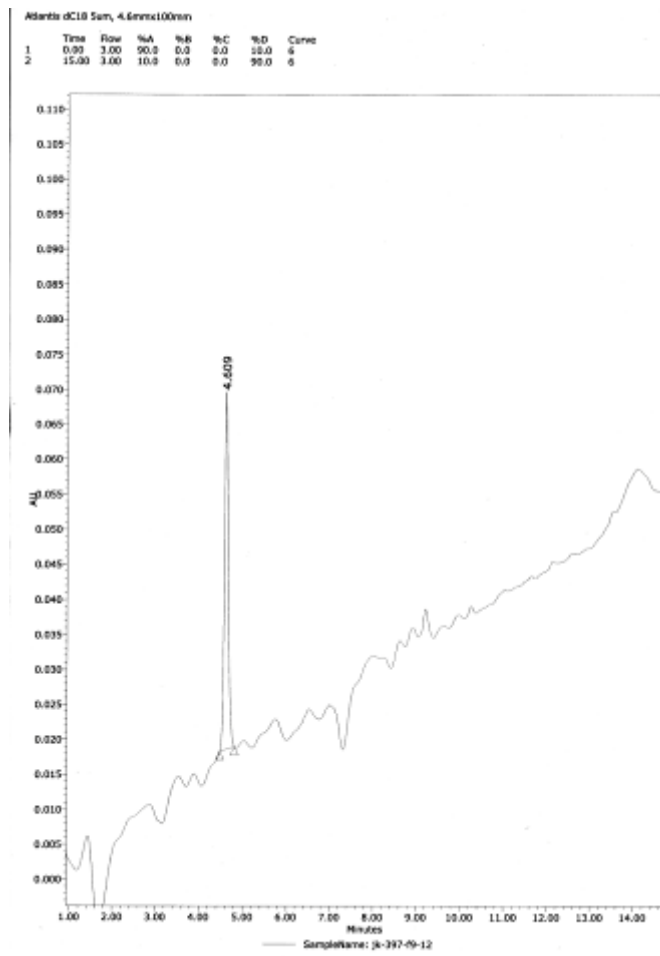

Dendrimer R1G1

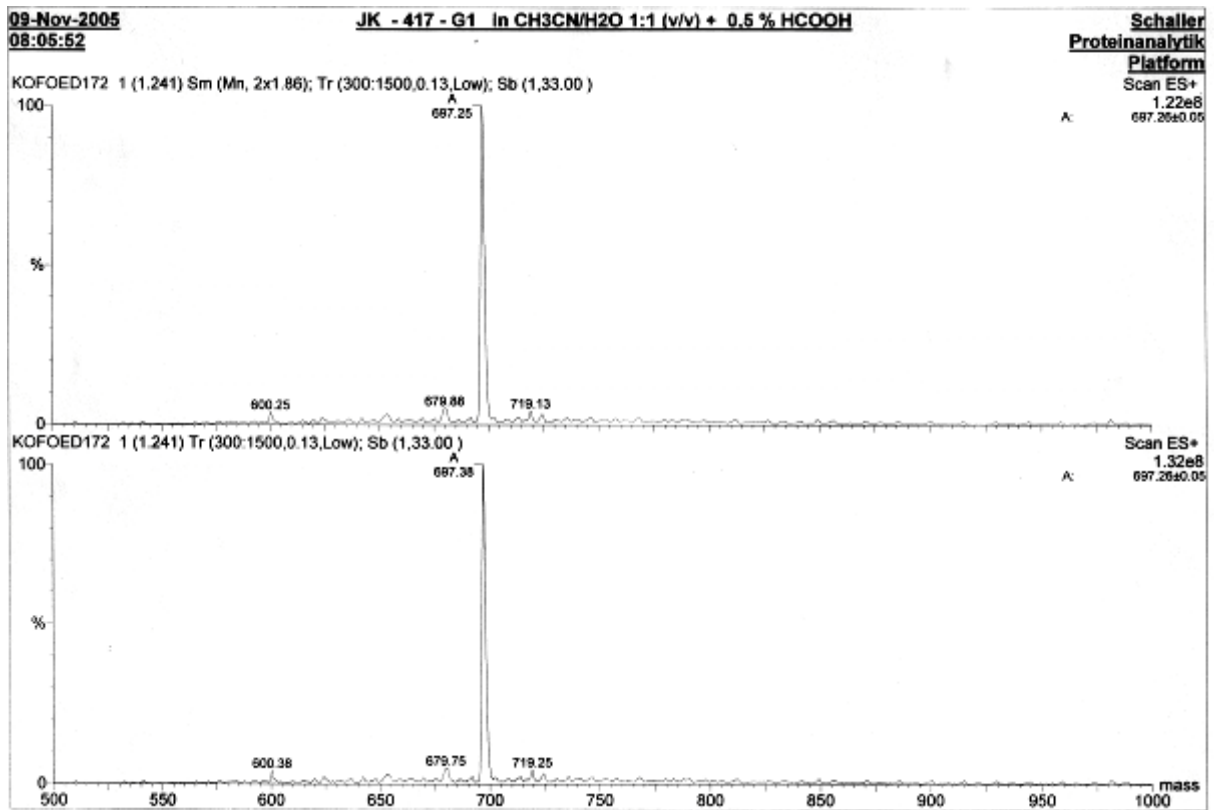

Atlantis dC18 Surr, 4.6mmx100mm

|   | Time  | Flow | Flow | %B  | %C  | %D  | Curve |
|---|-------|------|------|-----|-----|-----|-------|
| 1 | 0.00  | 1.00 | 10.0 | 0.0 | 0.0 | 0.0 | 1     |
| 2 | 15.00 | 1.00 | 10.0 | 0.0 | 0.0 | 0.0 | 2     |

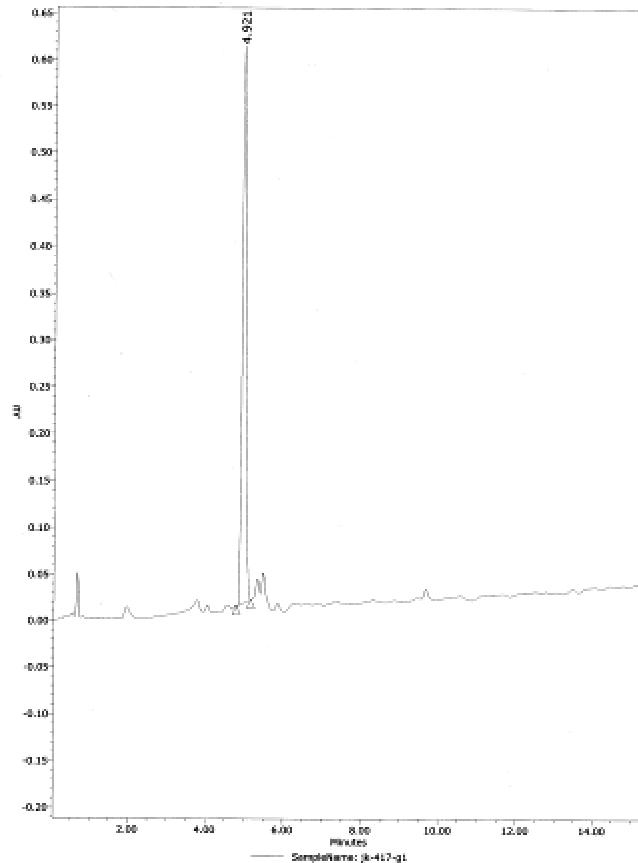

Dendrimer R1G2

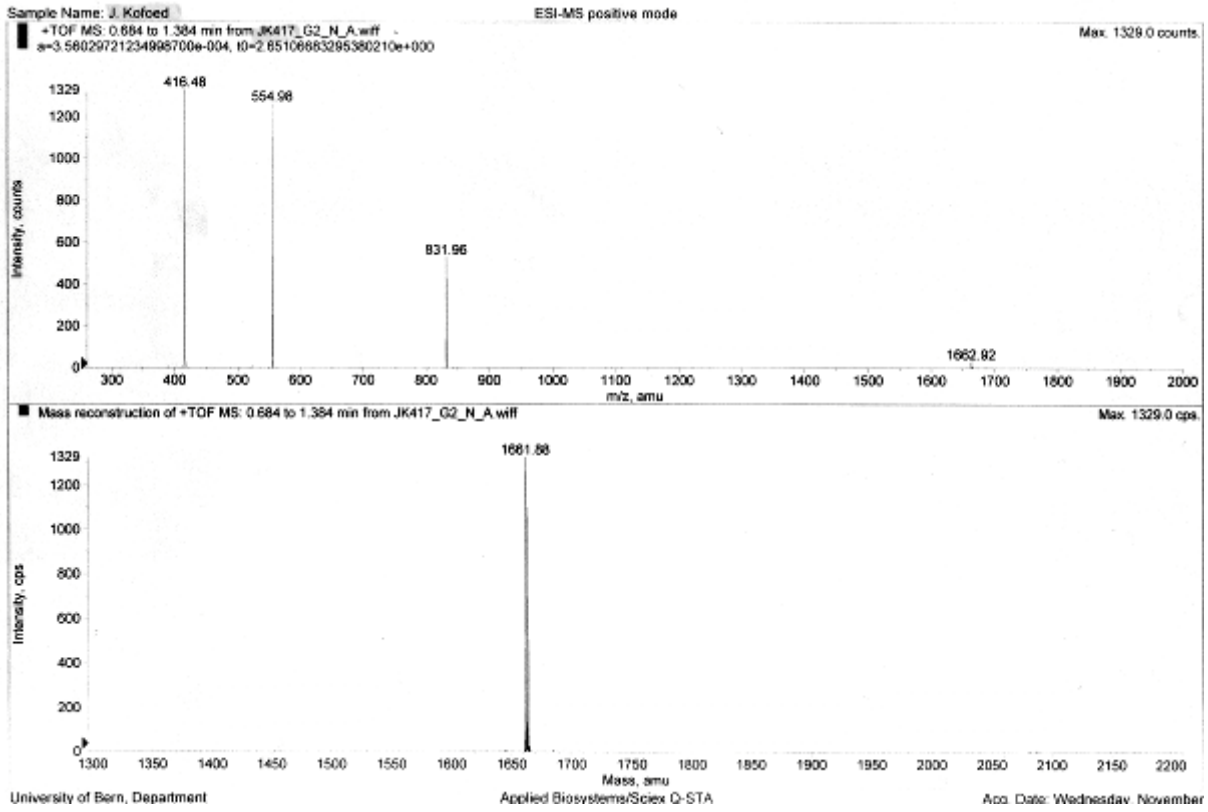

| Time      | Flow | %A   | %B  | %C   | %D   | Curve |
|-----------|------|------|-----|------|------|-------|
| 0.01      | 3.00 | 90.0 | 0.0 | 0.0  | 10.0 | 6     |
| 15.003.00 | 50.0 | 0.0  | 0.0 | 50.0 | 50.0 | 6     |

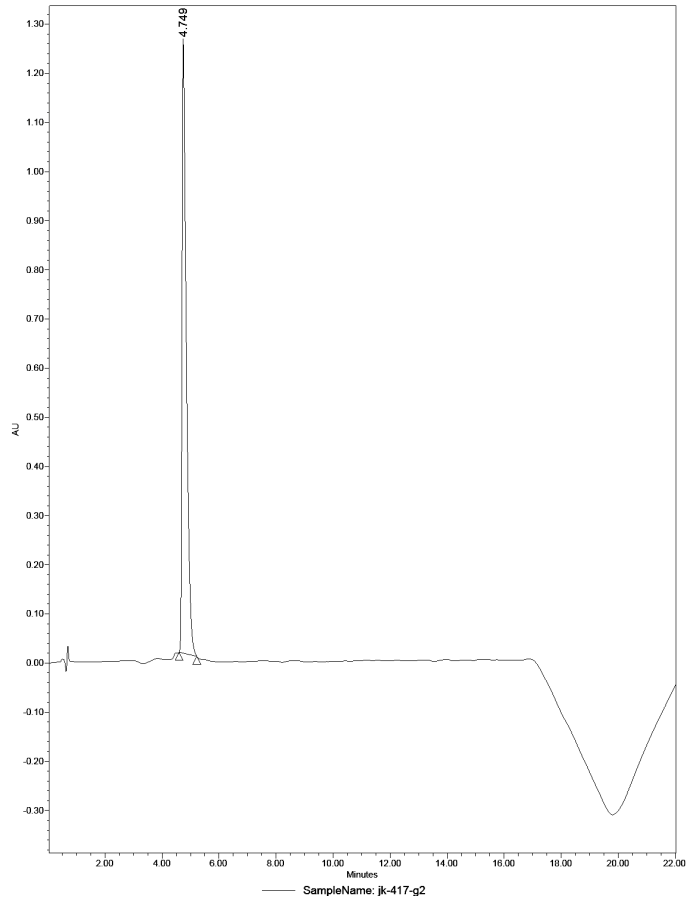

# Dendrimer R1G3

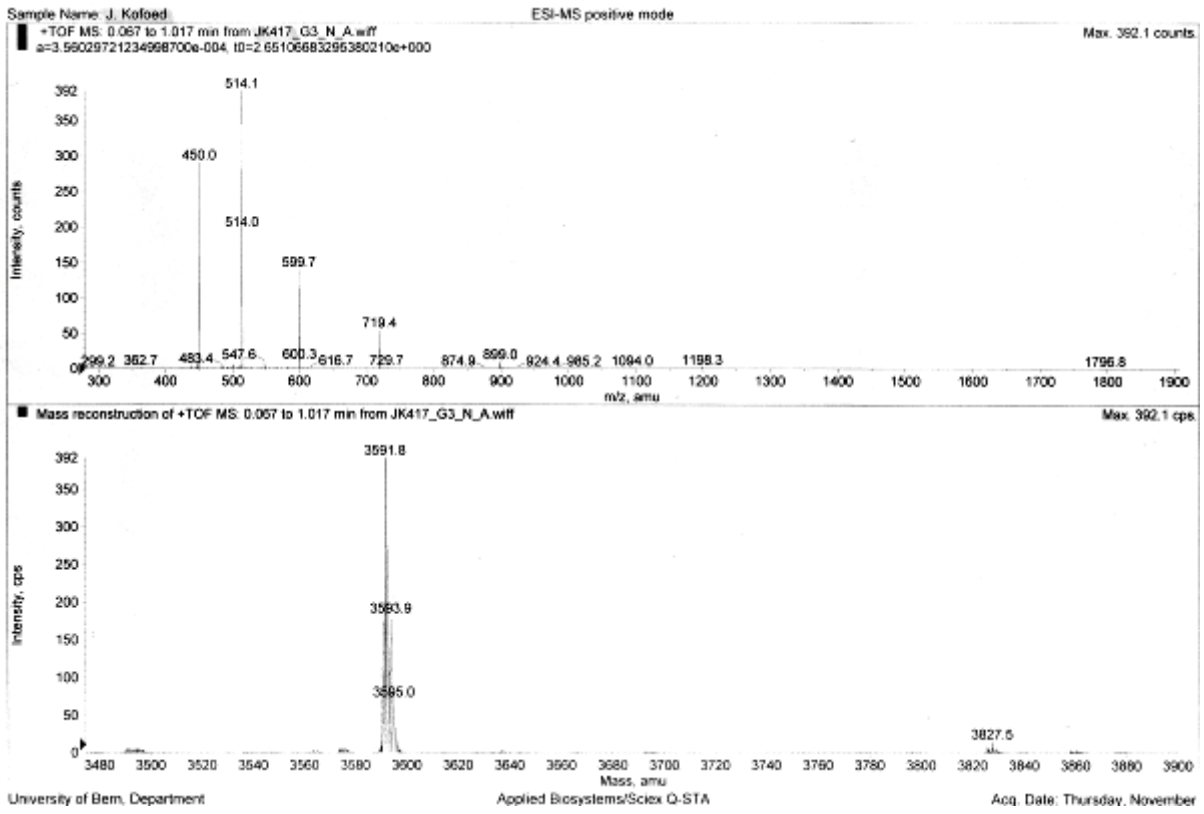

| Time   | Flow | %A   | %B  | %C  | %D   | Curve |
|--------|------|------|-----|-----|------|-------|
| 0.01   | 3.00 | 90.0 | 0.0 | 0.0 | 10.0 | 6     |
| 15.003 | 3.00 | 50.0 | 0.0 | 0.0 | 50.0 | 6     |

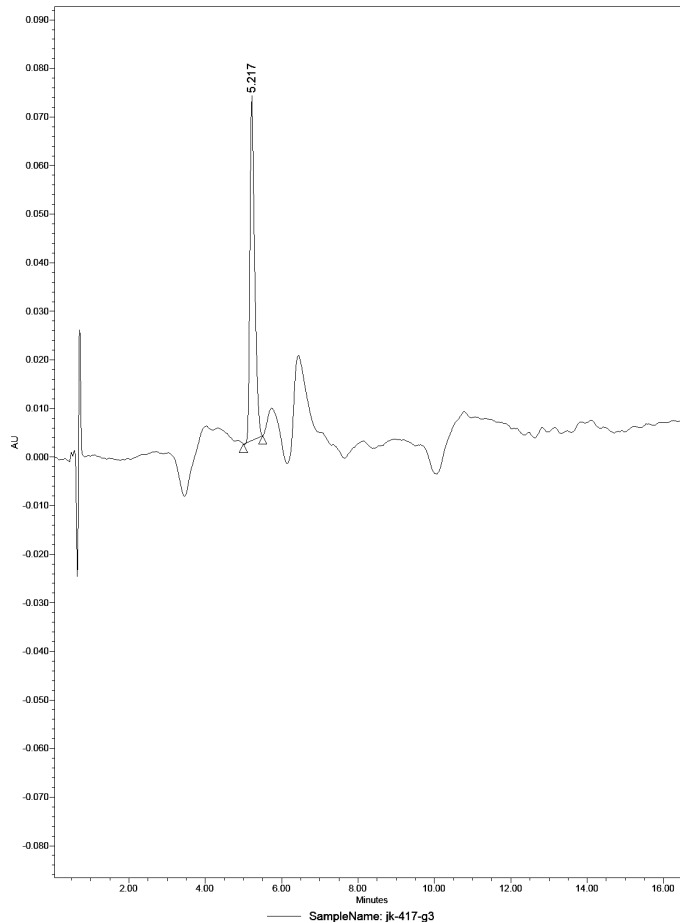

Dendrimer R2G1

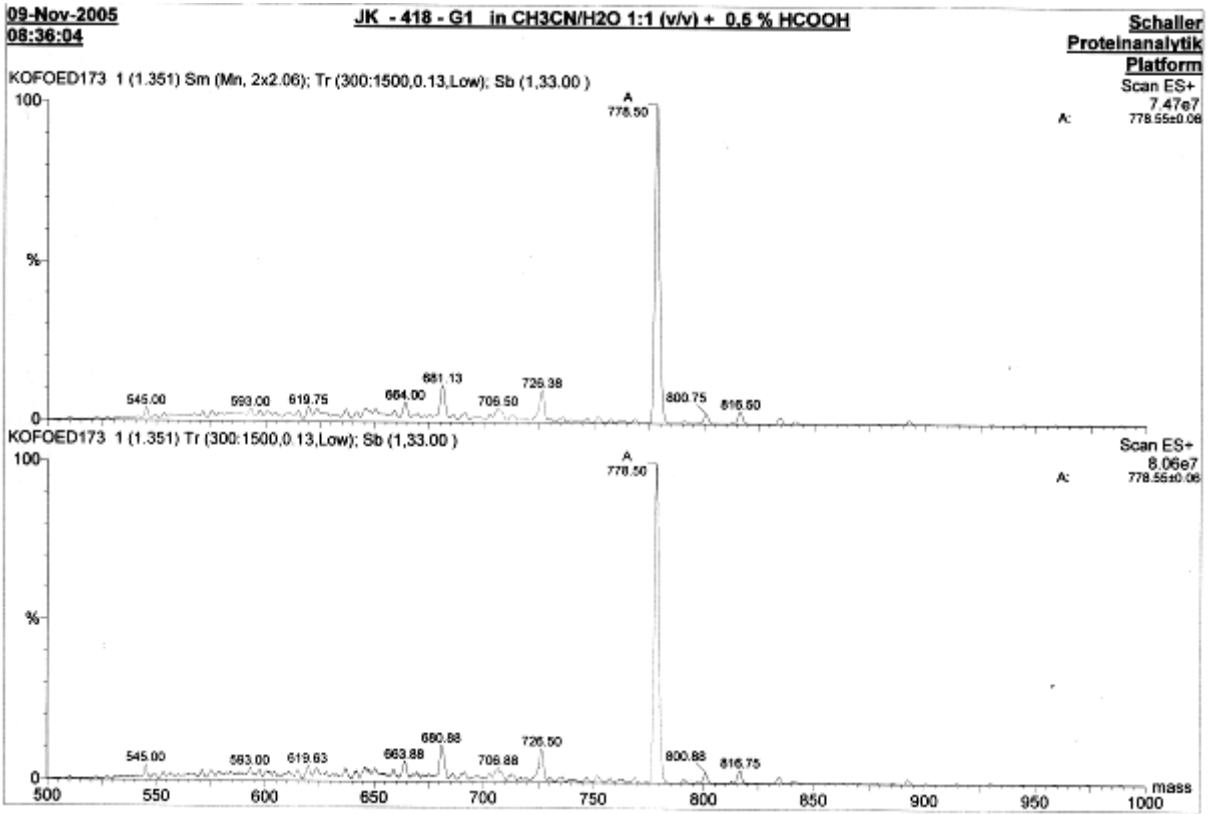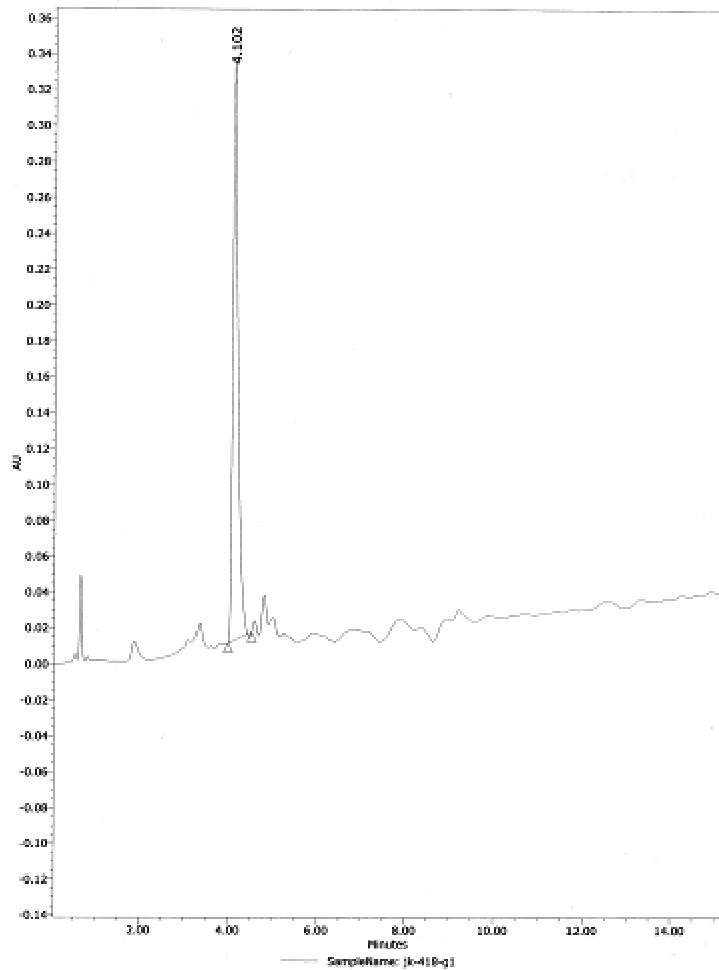

# Dendrimer R2G2

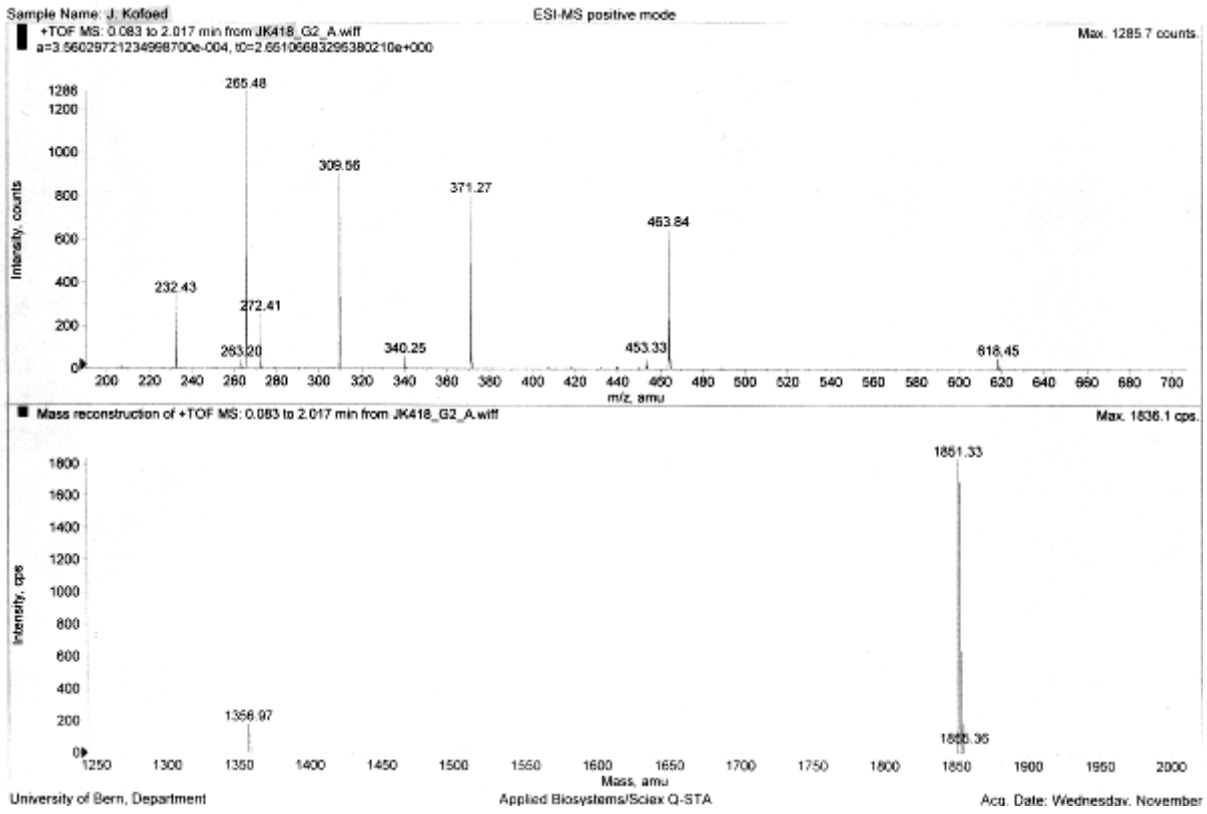

Atlanta vC18 Sum, 4.61min(1000Hz)

|   | Time  | Flow | %A   | %B  | %C  | %D   | Curve |
|---|-------|------|------|-----|-----|------|-------|
| 1 | 0.01  | 2.00 | 95.0 | 0.0 | 0.0 | 3.0  | 5     |
| 2 | 15.00 | 3.00 | 70.0 | 0.0 | 0.0 | 30.0 | 6     |

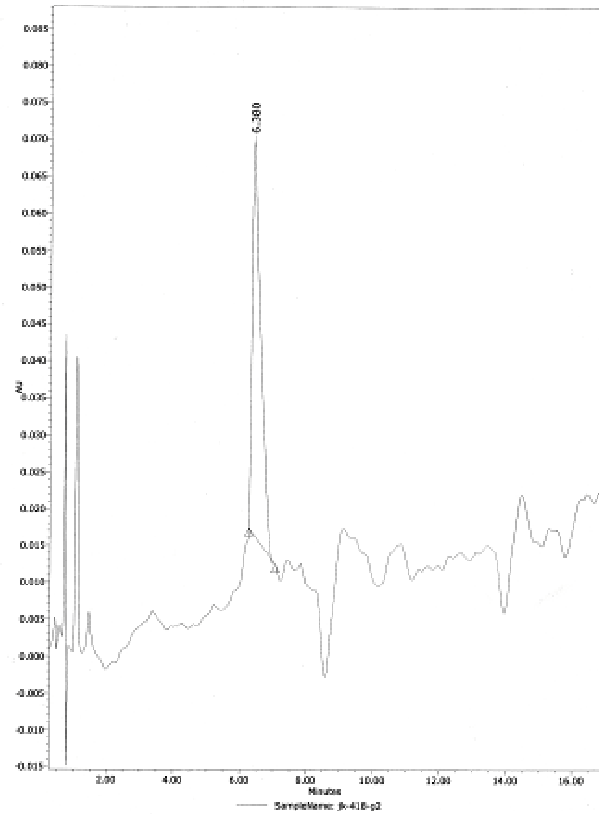

Dendrimer R2G3

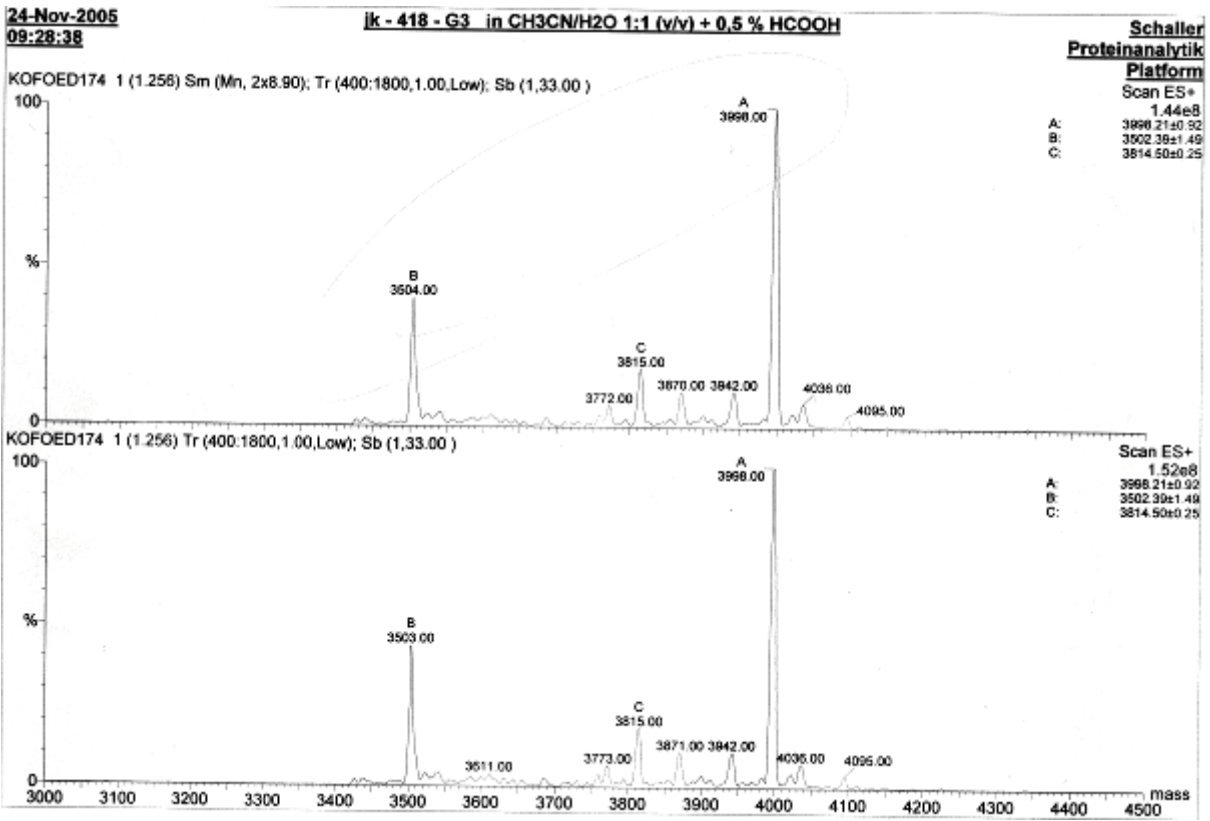

| Time      | Flow | %A   | %B  | %C   | %D   | Curve |
|-----------|------|------|-----|------|------|-------|
| 0.01      | 3.00 | 90.0 | 0.0 | 0.0  | 10.0 | 6     |
| 15.003.00 | 50.0 | 0.0  | 0.0 | 50.0 |      | 6     |

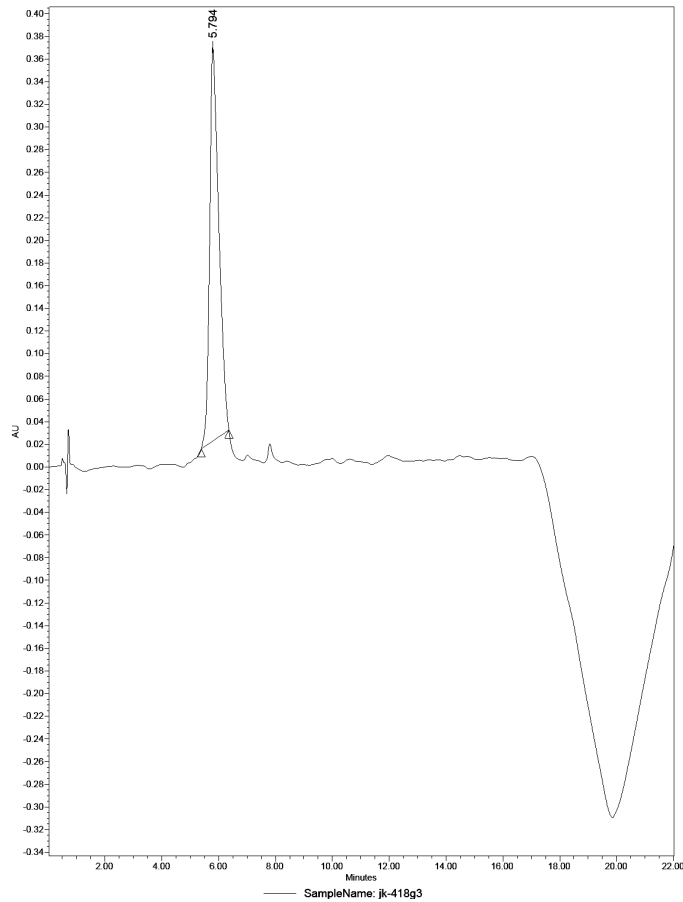

Supplement: b607342e.pdf [file b607342e.pdf]
